**Geographic variation in thermal physiological performance of the intertidal crab *Petrolisthes violaceus* along a latitudinal gradient**

Juan Diego Gaitán-Espitia<sup>1</sup>, Leonardo D. Bacigalupe<sup>1</sup>, Tania Opitz<sup>2</sup>, Nelson A. Lagos<sup>3</sup>,  
 Tania Timmermann<sup>4</sup> & Marco A. Lardies<sup>2,4,\*</sup>

<sup>1</sup> Instituto de Ciencias Ambientales y Evolutivas, Facultad de Ciencias, Universidad Austral de Chile, Casilla 567, Valdivia, Chile,

<sup>2</sup> Departamento de Ciencias, Facultad de Artes Liberales & Facultad de Ingeniería y Ciencias, Universidad Adolfo Ibáñez, Diagonal Las Torres 2640, Peñalolen, Santiago, Chile

<sup>3</sup> Centro de Investigación e Innovación para el Cambio Climático, Facultad de Ciencias, Universidad Santo Tomás, Ejército 146, Santiago, Chile

<sup>4</sup> Interdisciplinary Center for Aquaculture Research (INCAR)

\* Corresponding author: Dr. Marco A. Lardies, Departamento de Ciencias, Facultad de Artes Liberales & Facultad de Ingeniería y Ciencias, Universidad Adolfo Ibáñez, Diagonal Las Torres 2640, Peñalolen, Santiago, Chile. Phone: 56 2 3311583; e-mail: marco.lardies@uai.cl

**RUNNING TITLE:** Geographic variation in thermal physiology

## ABSTRACT

Environmental temperature has profound implications on the biological performance and biogeographical distribution of ectothermic species. Variation of this abiotic factor across geographic gradients is expected to produce physiological differentiation and local adaptation of natural populations depending on their thermal tolerances and physiological sensitivities. Here, we have studied geographic variation in whole-organism thermal physiology of seven populations of the porcelain crab *Petrolisthes violaceus* across a latitudinal gradient of 3000 km, characterized by a cline of thermal conditions. Our study found that populations of *P. violaceus* exhibit a lack of differences in the limits of their thermal performance curves and a negative correlation of their optimal temperatures with latitude. Additionally, our findings showed that high latitude populations of *P. violaceus* exhibited broader thermal tolerances, which is consistent with the Climatic Variability Hypothesis. Interestingly, under a future scenario of warming oceans, the thermal safety margins of *P. violaceus* indicate that lower latitude populations can physiologically tolerate the ocean warming scenarios projected by the IPCC for the end of the twenty-first century.

*Keywords: reaction norm, thermal sensitivity, heart rate, thermotolerance, thermal safety margin, latitudinal gradients*

## INTRODUCTION

For ectotherms, environmental temperature ( $T_a$ ) is perhaps the most important abiotic factor that affects their body temperature (Hochachka and Somero, 2002; Young et al., 2011) influencing a variety of organismal processes (Angilletta et al., 2002) with profound implications on their performance, physiology and fitness (Cano and Nieceza, 2006; Huey and Berrigan, 2001; Kingsolver and Huey, 2008).  $T_a$  also influences large scale process such as the biogeographical distribution and the habitat preferences of many ectothermic species (Hofmann and Todgham, 2010; Pörtner, 2002; Sunday et al., 2010), depending on their thermal tolerances and physiological sensitivities (Schulte et al., 2011; Sunday et al., 2014). Most physiological processes in ectotherms, operate within the bounds of lethal temperature extremes, with the performance of a physiological trait gradually increasing with  $T_a$  from a critical minimum ( $CT_{min}$ ) to an optimum ( $T_{opt}$ ) before dropping precipitously as  $T_a$  approaches a critical maximum ( $CT_{max}$ ) (Kingsolver, 2009; Wilson, 2001). This effect of  $T_a$  on performance is usually described by a continuous nonlinear reaction norm (i.e., thermal performance curve, TPC) (Huey et al., 1999). Variation in the parameters of the TPCs (i.e.,  $T_{opt}$ ,  $CT_{min}$ ,  $CT_{max}$ , maximum performance, and thermal breadth) has been used to describe mechanistically the variation of thermal sensitivities among natural populations of diverse ectothermic species (see Gaitán-Espitia et al., 2013; Kingsolver and Gomulkiewicz, 2003; Lachenicht et al., 2010). The evidence indicate that these parameters usually covary with geographic clines (e.g., latitude), reflecting at least partial adaptation of ectotherms to their environments (Castañeda et al., 2004; Gaitán-Espitia et al., 2013).

Phenotypic plasticity and/or local adaptation to thermal clines can cause different

patterns of thermal performance across the geographic range of an ectothermic species  
 (Gardiner et al., 2010; Huey and Kingsolver, 1989; Knies et al., 2009; Schulte et al.,  
 2011; Yampolsky et al., 2014). These patterns can be explained by at least four  
 theoretical models of thermal evolution (Angilletta et al., 2002; Gardiner et al., 2010).  
 The basis of these models contain implicit assumptions about the existence of  
 evolutionary trade-offs acting on thermal physiology as a result of negative genetic  
 correlations between performance and  $T_a$  (Angilletta et al., 2002; Huey and Kingsolver,  
 1993). For instance, the counter-gradient variation model explains that populations from  
 cooler environments (high latitudes) tend to exhibit higher maximum performance ( $\mu_{\max}$ )  
 than those from warmer environments (low latitudes) at all temperatures. This pattern is  
 predicted when genetic and environmental influences on performance are negatively  
 associated across the thermal gradient (Angilletta, 2009; Gardiner et al., 2010). Contrary  
 to this, if genetic and environmental influences on performance are positively associated,  
 the pattern of thermal performance would be related to the co-gradient variation model in  
 which populations from warmer environments (low latitudes) tend to exhibit higher  $\mu_{\max}$   
 and  $T_{\text{opt}}$  than populations from cooler environments (high latitudes) (Conover et al.,  
 2009; Gardiner et al., 2010). On the other hand, the local adaptation model states that if  
 thermodynamic constraints do not limit adaptation to temperature, then adaptation to  
 warmer and colder environments is expected to result in equal  $\mu_{\max}$  in their corresponding  
 $T_{\text{opt}}$  (Angilletta, 2009). Finally, if populations do not acclimate to the local thermal  
 environment and high gene flow between populations restricts local adaptation to a  
 thermal gradient, then it would be expected no differences in TPCs among populations  
 (Gardiner et al., 2010).

In addition, theory suggests that thermal tolerances and sensitivities of many organisms are proportional to the magnitude of  $T_a$  variation they experience (Addo-Bediako et al., 2000; Calosi et al., 2010; Gaitán-Espitia et al., 2013), a characteristic of climate that also increases with latitude (Ghalambor et al., 2006; Janzen, 1967; Naya et al., 2011). Therefore, it is expected that individuals at higher latitudes require broader tolerance ranges (i.e., greater physiological plasticity) than individuals inhabiting lower latitudes (i.e., Climatic Variability Hypothesis, CVH; Chown et al., 2004; Ghalambor et al., 2006; Janzen, 1967; Naya et al., 2011; Stevens, 1989). This is particularly interesting in the case of organisms that inhabit highly variable habitats, such as the rocky intertidals, because these habitats are characterized by a wide range of thermal conditions due to the tidal cycle (Helmuth and Hofmann, 2001; Helmuth et al., 2002). During low tide, the intertidal exhibits a steep thermal stress gradient which increases with the shore height (Helmuth et al., 2006). In these habitats, intertidal invertebrates experience temperatures at or above their heat tolerance limits during times when low tide occurs simultaneously with a heat wave (Helmuth et al., 2002; Helmuth et al., 2006; Stillman, 2003).

Under this context, here we investigated the geographic variation in thermal sensitivity and thermal tolerance of physiological traits among seven populations of the intertidal crab *Petrolisthes violaceus* (Guerin, 1831) spanning a latitudinal gradient of ca. 3,000 km in the Chilean coast. Our central question was: *Do the individuals of low latitude populations effectively live closer to their thermal limits compared with populations of central or high latitudes?* Thus, the objectives of this study were: (i) To characterize the TPCs at the intraspecific level in seven local populations of *P. violaceus* along a latitudinal gradient of ca. 3,000 km in the Chilean coast; (ii) To determine the

geographic variation in their thermal physiology and organismal performance.

## RESULTS

### Latitudinal variability of *in situ* seawater temperature

The high-resolution monitoring program of intertidal temperature evidenced a clear latitudinal cline in annual mean and absolute minimum *in situ* seawater temperature (SST) along the Chilean coast (Figure 1A-C). Lower values and greater variation (ca. 5 °C) of annual *in situ* mean and absolute minimum SST were observed at high latitudes (Figure 1B and C). Annual absolute minimum and maximum *in situ* SST showed two marked thermal breaks at 30°S and 40°S (Figure 1B and C). These breaks were also evident for the coefficient of variation of daily mean *in situ* SST (Figure 1D). On the other hand, there were not latitudinal trends for heating/cooling days (i.e., days where exposure was over/under the CT<sub>max</sub> and CT<sub>min</sub> respectively). Signals of heating days were evidenced only for Antofagasta and Talcaruca at low latitude, whereas cooling days were detected only in Chiloe, at high latitude (Supplementary Table 1).

### Thermal performance curves

The best-fit models used to describe the thermal performance curves (TPC) of *P. violaceus* populations (Table 1), revealed the typical left-skewed TPC shape (Figure 2). The upper and lower limits of temperature at which the heart rate (HR) decreased (CT<sub>min</sub> and CT<sub>max</sub>) were similar among populations (Table 2), without statistical differences along the latitudinal gradient (One-way ANOVA, CT<sub>min</sub>:  $F_{6,94}=2.09$ ,  $P=0.06$ ; CT<sub>max</sub>:  $F_{6,94}=1.37$ ,  $P=0.23$ ). However, there were detected differences in the thermal optimum

( $T_{opt}$ ), thermal breadth ( $T_{br}$ ) and maximal performance ( $\mu_{max}$ ) among populations (Table 2; One-way ANOVA,  $T_{opt}$ :  $F_{6,94}=17.26$ ;  $T_{br}$ :  $F_{6,94}=7.63$ ;  $\mu_{max}$ :  $F_{6,94}=8.35$ ,  $P < 0.05$ ).

Overall, critical thermal limits showed no signature of latitude across the geographic range of the species (CI 95 for latitude:  $CT_{max} = -0.047, 0.096$ ;  $CT_{min} = -0.016, 0.021$ ) (Figure 3D and E). In addition, neither the height of the TPCs (CI 95 for latitude:  $\mu_{max} = -2.34, 0.791$ ) nor their amplitude (CI 95 for latitude:  $T_{br} = -0.550, 0.019$ ) changed across latitude (Figure 3B and C). Similar results were evidenced for these four TPC parameters when the climatic variables related to *in situ* SST (mean, maximum, minimum, coefficient of variation and heating/cooling days) were included in the analysis (results not shown). On the other hand,  $T_{opt}$  was negatively influenced by the geographic gradient (CI 95 for latitude:  $T_{opt} = -0.543, 0.130$ ,  $b = -0.335 \pm 0.108$  SE) (Figure 3A).

### Critical thermal resistance

Chill and heat coma (Critical thermal resistances), using roll over speed as a proxy of the relationship between organismal performance and environmental temperature, exhibited differences among populations in the latitudinal gradient (Kruskal-Wallis test, Chill coma:  $H_6 = 78.03$ ; Heat coma:  $H_6 = 57.05$ ,  $P < 0.05$ ). From these indexes of thermal tolerance, only the critical thermal resistance to low temperatures ( $CTR_{min}$ ) was influenced by latitude (Figure 4A; CI 95 for latitude:  $CTR_{min} = -0.543, 0.130$ ,  $b = -0.063 \pm 0.01$  SE).

### Warming tolerances and thermal safety margins

Although warming tolerance (WT) and thermal safety margin (TSM) evidenced differences among populations (One-way ANOVA, WT:  $F_{6,94}=11.79$ ; TSM:  $F_{6,94}=7.02$ ,  $P < 0.05$ ), both indexes showed opposite trends along the latitudinal gradient (Table 2). WT of the species increased towards higher latitudes (CI 95 for latitude: WT = 0.142, 0.332;  $b = 0.237 \pm 0.05$  SE) whilst TSM showed no clear pattern with latitude (CI 95 for latitude: TSM = -0.319, 0.073) (Figure 5A and B).

## DISCUSSION

In this study, we assessed the geographic variation in whole-organism thermal physiology of seven populations of the porcelain crab *P. violaceus* across a latitudinal gradient of ca. 3000 km, characterized by different local thermal conditions. Our study found that populations of *P. violaceus* exhibit differences in thermal sensitivities (i.e., different patterns of thermal performance curves) and thermal tolerances. These findings are consistent with the Climatic Variability Hypothesis, in which populations at higher latitudes exhibit broader tolerance ranges than populations inhabiting lower latitudes with more stable environments (Janzen, 1967; Levinton, 1983; Naya et al., 2011). The strong association between latitude and climate does not permit separation of these factors to establish to what extent higher physiological tolerance at higher latitudes is due to the direct effect of climatic variability or to other factors associated with latitude (Ghalambor et al., 2006).

### Latitudinal variation in habitat thermal conditions

The marine intertidal zone along the Chilean coast is characterized by a thermal



gradient with lower values of annual *in situ* mean and absolute minimum seawater temperature (SST) at high latitudes. This clinal change of SST along the southeastern Pacific is related to a conspicuous gradient in solar irradiation (Broitman et al., 2001), the influence of atmospheric circulation and rainfall variability (Barros and Silvestri, 2002) and the effect of other oceanographic processes (Thiel et al., 2007). Our results revealed that *in situ* SST was much variable at higher latitudes (30°S - 42°S) than at lower latitudes (20°S - 24°S), something that has also been shown in previous studies along the Chilean coast (Broitman et al., 2001; Lagos et al., 2005).

In the southeastern Pacific coast of Chile, there are two biogeographic breaks located in areas with sharp discontinuities in upwelling regimes (30–32°S) and with strong influence of the Antarctic Circumpolar Current (40°S–42°S) (Camus, 2001; Thiel et al., 2007). These geographic breaks are in accordance with the thermal breaks that we found at 30°S and 40°S for all of the variables related to *in situ* SST (mean, maximum, minimum and coefficient of variation). Some authors have shown that these environmental discontinuities influence the temporal and spatial dynamics of benthic and pelagic communities (Rivadeneira et al., 2002; Thiel et al., 2007), the species composition (Meneses and Santelices, 2000), the larval dispersal and gene flow of many marine species (Brante et al., 2009; Haye et al., 2014; Sánchez et al., 2011; Thiel et al., 2007) and the phenotypic (co)variation of fitness-related traits (Barria et al., 2013). However, in the case of the intertidal crab *P. violaceus*, the evidence indicates that these biogeographic breaks do not affect the gene flow and genetic structure of its populations probably as a result of its long dispersal capacity (larvae spend 15 or more days in the water column) (Haye et al., 2014).

## Thermal physiological variation in natural populations

According to theoretical models of thermal evolution, the absence of genetic structure and high gene flow between populations may constrain local adaptation to a thermal gradient (Angilletta, 2009; Gardiner et al., 2010). This in turn would be reflected in a lack of differences in all of the parameters of the thermal performance curves (TPCs) among populations (Gardiner et al., 2010). Our results offer partial support to this idea. Overall, *P. violaceus* populations along the latitudinal gradient exhibited differences in their thermal sensitivities that are explained by three parameters of the TPCs (Optimal temperature,  $T_{opt}$ ; thermal breadth,  $T_{br}$ ; and maximal performance,  $\mu_{max}$ ). Nonetheless, our results indicate that the upper and lower limits of temperature at which the heart rate (HR) decreased ( $CT_{max}$  and  $CT_{min}$ ) are similar among populations, without an effect of the climatic variables or the geographic gradient. These findings are possibly explained by the limited capacities of ectotherms to adapt the  $CT_{min}$  and  $CT_{max}$  in the face of  $T_a$  variation (Faulkner et al., 2014; Hoffmann et al., 2013; Stillman, 2003). Moreover, it has been documented that the upper and lower critical temperatures are controlled by biophysical and thermodynamic constraints (Hoffmann et al., 2013; Somero, 2005) that influence the shape and limits of the TPCs (Angilletta, 2009). Our critical temperatures for HR were on average beyond maximum and minimum *in situ* SST along the Chilean coast, and are closed to the limits of the ranges described for other species of porcelainid crabs of the genus *Petrolisthes* ( $CT_{max}$  from 28.4 - 41.7°C and  $CT_{min}$  from -1.3 - 11.3 8C) (Stillman, 2003). In these species, inter-population differences in the thermal cardiac performance are evidenced between seasons and across latitudinal gradients in

accordance with their habitat temperature differences (Stillman and Tagmount, 2009) and their local thermal microhabitat conditions (Stillman, 2003; Stillman, 2004). For example, porcelainid crabs from warmer habitats exhibit higher  $CT_{max}$  compared to species from cooler habitats, whereas the opposite pattern is described for  $CT_{min}$  (Stillman, 2003).

From the three TPC parameters that differed among populations of *P. violaceus*, only  $T_{opt}$  showed signals of geographic influence (negative correlation with latitude). This pattern of thermal performance follows some of the expectations of the co-gradient variation model in which populations from warmer environments (low latitudes) tend to exhibit higher  $\mu_{max}$  and  $T_{opt}$  than populations from cooler environments (high latitudes) (Conover et al., 2009; Gardiner et al., 2010). The analyses of  $\mu_{max}$  and  $T_{br}$  between the most extreme populations of *P. violaceus* in Chile are consistent with this model of thermal evolution. However, the effect of the geographic and climatic gradient on these TPC parameters is eroded by the values of  $\mu_{max}$  and  $T_{br}$  in populations that inhabit close to the southern limit of the thermal and biogeographic break located between 30–32°S. For some porcelainid species in the northern hemisphere, the evidences suggest that in addition to latitude, the habitat temperature range or fluctuation is a more important environmental factor in setting thermal performance than mean habitat temperature (Stillman and Tagmount, 2009). This pattern was not consistent with our findings probably due to the lower differences in the temperature ranges along the latitudinal cline in the Chilean coast compared to the northern hemisphere.

**Thermal tolerances and thermal safety margins**

Thermal tolerances are closely related to the biogeographic distribution of marine species along latitudinal and vertical clines in coastal ecosystems (Pörtner, 2002; Somero, 2005). It is known that heat-tolerance limits of ectothermic species vary little with latitude whereas cold-tolerance limits decline steadily with increasing latitude (Sunday et al., 2014). In our study, populations of *P. violaceus* along the Chilean coast differed in their critical thermal resistances to high ( $CTR_{max}$ ) and low ( $CTR_{min}$ ) temperatures. However, from these indexes of thermal tolerance, only the  $CTR_{min}$  evidenced a geographic influence that may suggests adaptation to local environmental conditions (Somero, 2005) in which the lower  $CTR_{min}$  exhibited by crabs from high latitude populations is perhaps the result of natural selection favoring a more cold-adapted populations, which has been observed in other ectotherms (Keller and Seehausen, 2012; Pörtner et al., 2000; Stitt et al., 2014).

In addition to the cold-tolerance findings, the average amount of environmental warming that populations of *P. violaceus* can tolerate before performance drops to fatal levels (i.e., warming tolerance) (Deutsch et al., 2008a), points out the existence of a positive correlation of this thermal tolerance index with latitude. This pattern has been described for other ectotherms suggesting that at low latitudes rising  $T_a$ , associated to global warming, is likely to have the most deleterious consequences because ectothermic species in these geographic areas are relatively sensitive to temperature change and are currently living very close to their  $T_{opt}$  (Deutsch et al., 2008a; Stillman, 2002; Sunday et al., 2014). Interestingly, our results about thermal safety margins (the differential between organism's  $T_{opt}$  and its current  $T_a$ ) (Deutsch et al., 2008a) of *P. violaceus* crabs, that are the first in marine ectotherms, indicate that populations at high latitudes are

closer to their physiological optima than those populations from low latitudes. These results may suggest that low latitude populations of *P. violaceus* might be able to physiologically tolerate the increase in temperature projected by the IPCC for the end of the twenty-first century (ca. 4 °C in the RCP8.5 scenario) (IPCC, 2013). Nonetheless, in the case of the southeastern Pacific, it has been described a departure of the the general ocean warming trend described by the IPCC (Aravena et al., 2014; Falvey and Garreaud, 2009). Indeed, recent studies have found a SST cooling (ca. -0.2°C/decade) along the Chilean coast related to a Niña-like intensification of the South Pacific Anticyclone (Aravena et al., 2014; Falvey and Garreaud, 2009). This SST cooling might play an important role in the geographic variation of the thermal resistances to low temperatures ( $CTR_{min}$ ) that we found in our study.

In summary, because the geographical range of *P. violaceus* covers a broad latitudinal gradient of climate conditions, we expected to find signals of physiological differentiation of natural populations as well as adaptation to local  $T_a$  (Ghalambor et al., 2006; Janzen, 1967; Kuo and Sanford, 2009; Levinton, 1983). Indeed, we observed differences in their thermal sensitivities that are explained by partial combination of two models of thermal evolution characterized by the lack of differences in the limits of the TPCs and the negative correlation of  $T_{opt}$  with latitude. Additionally, high latitude populations of *P. violaceus* exhibited broader thermal tolerances which is consistent with the Climatic Variability Hypothesis (Ghalambor et al., 2006; Janzen, 1967). Finally, under a future rising  $T_a$  scenario, our findings about the TSM indicate that lower latitude populations can physiologically tolerate future warming, at least that one projected by the IPCC for the 2100.

## MATERIAL AND METHODS

### Study populations and sites

*Petrolisthes violaceus* is a free-living porcellanid crab commonly found in the rocky intertidal low zone of the south-eastern Pacific (Vargas et al., 2010; Viviani, 1969) and distributed in a latitudinal gradient along the Chilean coast, characterized by large and meso-scale variations in the intensity of coastal upwelling (Thiel et al., 2007; Torres et al., 2011), as well as spatial variation in sea surface temperature (SST) and air temperature (Figure 1) (Lagos et al., 2005). Animals were collected randomly by hand on low tides during 2011 and 2012 from the rocky intertidal area of Iquique (20°19' S, 70°15' W), Antofagasta (23°46' S, 70°40' W), Talcaruca (30°29' S, 71°41' W), El Tabo (33°27' S, 71°66' W), Lenga (36°45' S, 73°10' W), Valdivia (39°46' S, 73°23' W) and Chiloé (40°52' S, 73°59' W). These seven locations along the southeastern coast of Chile (ca. 3,000 km), encompass much of the species' latitudinal range (Figure 1). To remove possible confounding effects of sex, only male crabs were used in the experiments and physiological measurements. Individuals were chilled and transported to the laboratory at the Universidad Adolfo Ibáñez, where they were maintained in common garden conditions, at constant temperature (14°C) in artificial seawater (ASW; 33 ppm; Instant Ocean® sea salt dissolved in distilled water) for one month. Crabs were exposed to a light/dark cycle of 12/12 h and fed with Instant Algae® and aquarium shrimp food three times a week.

A high-resolution monitoring program of intertidal temperature was developed along the latitudinal gradient in the Chilean coast. Trends in intertidal temperature (SST;

annual and daily mean and variance) and other environmental variables such as heating/cooling days (i.e., days where exposure was over/under of the  $CT_{max}$  and  $CT_{min}$  respectively) were monitored between 2011 and 2013. Temperature loggers (TibdiT®, Onset Computer Corp. MA, USA) were deployed in the low intertidal level (ca. 0.2 – 0.3 m above mean lower low water, MLLW) of each location. Intertidal logger records both seawater and air temperature (during extreme low tides), which are significantly correlated (Menge et al., 2008). Thus, recording overall fluctuations in temperature experienced by the species model at each local intertidal habitat.

### **Thermal performance curves**

Thermal effects on physiological performance were estimated for populations of *P. violaceus* along the latitudinal gradient in the Chilean coast. Here we used heart rate (HR; cardiac activity) and rollover speed (RS; the speed at which animals change from the inverse to the upright position) as proxies of the relationship between organismal performance and  $T_a$  (Bruning et al., 2013; Gaitán-Espitia et al., 2013; Schulte et al., 2011). A total of 210 adult individuals (30 crabs for each population) were selected for analyzes of thermal sensitivities (i.e., thermal performance curves, TPCs). TPCs for HR were described in terms of four parameters: (1) the optimal temperature ( $T_{opt}$ ); (2) the thermal breadth ( $T_{br}$ ); (3) the maximal performance ( $\mu_{max}$ ); and (4) the upper and lower limits of temperature at which the HR decrease ( $CT_{min}$  and  $CT_{max}$ ) (Angilletta, 2009). At each temperature, animals were exposed separately in plastic chambers with six subdivisions (200 x 200 x 100 mm), installed in a thermo-regulated bath at constant sea water temperature ( $\pm 0.5$  °C, LWB-122D, LAB TECH), for 30 min. We randomized the order of temperature trials for each individual and ensured at least 24 h of rest between

trials. Experimental temperatures for TPCs were chosen between 0 and 31 °C. In extreme temperatures of the thermal treatment (i.e., 0 to 6 °C and 26 to 31 °C) HR was measured every 1 °C, whereas at intermediate temperatures (i.e., 6 to 26 °C) it was measured every 2 °C. HR was estimated using a heartbeat amplifier AMP 03 (Newshift Lda®) connected to an oscilloscope and the results were expressed in beats min<sup>-1</sup>. Measurements of cardiac activity were performed at the same period of the day to cancel the effects of a possible circadian and tidal rhythm of respiration.

The mean HR for each crab at each experimental temperature was calculated with the aim of estimating the TPCs for each population. We used the TableCurve2D curve-fitting software (version 5.01; Systat Software, Inc.) for model fitting. TPC parameters ( $\mu_{\max}$ ,  $T_{\text{opt}}$ ,  $CT_{\min}$  and  $CT_{\max}$ ) were extracted from the best models (see below for details). The ecophysiological characteristics of critical thermal maximum ( $CT_{\max}$ ) and minimum ( $CT_{\min}$ ) were derived numerically as the intersection points of the resulting thermal performance curve with the temperature axis ( $\mu=0$ ). Temperature breadth ( $T_{\text{br}}$ ) for each population was calculated with the mean values of HR for each experimental temperature using the following equation (Gilchrist, 1996):

$$T_{\text{br}} = \sqrt{\sum_{i=1}^N \left[ \frac{\mu_i (T_i - T_{\text{opt}})}{\mu_{\max}} \right]^2}$$

where N equals the number of temperatures and  $\mu_i$  is the mean HR at temperature  $T_i$ .

### **Thermal coma and thermal tolerances**

Critical thermal resistances to high and low temperatures ( $CTR_{\min}$  and  $CTR_{\max}$ ) were estimated in a total of 185 adult individuals of *P. violaceus* using the thermal coma



methodology (see Gaitán-Espitia et al., 2013). Overall, thermal comas were defined as the lack of ability to achieve an upright position, or lack of movement of structures and/or appendices within a pre-defined time period (e.g., Bacigalupe et al., 2007; Castañeda et al., 2005; Gaitán-Espitia et al., 2013; Lutterschmidt and Hutchison, 1997). This measure is sub-lethal and is useful for a broad range of ectothermic invertebrates and large sizes samples (Huey et al., 1992). Animals were exposed separately in plastic chambers with 6 subdivisions (200 x 200 x 100 mm), installed in a thermo-regulated bath at constant sea water temperature ( $\pm 0.5$  °C, LWB-122D, LAB TECH), for 30 min. In the last 15 minutes, crabs were turned over and if an individual was not in a thermal coma, it responded by returning to an upright position. At extreme temperatures, some individuals had zero performance. Those animals that exhibited a complete loss of righting response under extreme temperatures were considered to be in a thermal coma (e.g., Castañeda et al., 2005; Gaitán-Espitia et al., 2013; Lutterschmidt and Hutchison, 1997). Tolerance ranges were determined experimentally *a priori*.

### **Warming Tolerance and thermal safety margin**

At the collection sites of *P. violaceus*, mean habitat temperature ( $T_{\text{hab}}$ ) and variance ( $\sigma_t$ ) were extracted from high-resolution temperature data-logger as the mean and standard deviation of monthly sea surface temperature (SST). Theoretically, seasonality (variance) is a strong predictor of warming tolerance ( $WT = CT_{\text{max}} - T_{\text{hab}}$ ) and also of thermal safety margins ( $TSM = T_{\text{opt}} - T_{\text{hab}}$ ) (for details see Deutsch et al., 2008b). These correlations simply reference the position of performance curves to local climate conditions.

## Statistical analyses

Prior to analyses, we tested for normality and homoscedasticity for all variables using the Lilliefors and Levene tests, respectively. Data was transformed either by  $\log_{10}$  or by square root to fulfil the requirements for parametric tests. The fit of several functions (e.g., Gaussian, Lorentzian, Weibull) that could describe organismal performance as a function of temperature was analyzed using the Akaike Information Criterion (Angilletta, 2006). The AIC represents a balance between the likelihood explained by the model and the number of model parameters, with the best model minimizing AIC (Kingsolver and Massie, 2007). Thermal physiological traits obtained from the TPCs (i.e.,  $\mu_{\max}$ ,  $T_{\text{opt}}$ ,  $T_{\text{br}}$ ,  $CT_{\min}$  and  $CT_{\max}$ ) and WT and TSM indexes were analysed using a mixed modelling approach, with locality as a random grouping factor. The effect of latitude (fixed effect) was evaluated through confidence intervals computed from the likelihood profile (Bates et al., 2013). Critical thermal resistances (i.e., thermal comas) were analyzed using Kruskal-Wallis test. In all cases, when differences in the means were significant at the  $P < 0.05$  level, they were also tested with a posteriori Tukey's test (HSD). Statistical analyses were performed with R 3.0.2 software and the package lme4 (Bates et al., 2013).

## Acknowledgments

Financial support was partially provided by a FONDECYT 1110743 and INCAR (FONDAP 15110027) grant to MAL. The Millennium Nucleus Center for the Study of Multiple-drivers on Marine Socio-Ecological Systems (MUSELS) by MINECON Project

NC120086 also supported this work during the final stage. JDGE and LBD were supported by FONDECYT-Postdoctoral grant No. 3130381 and FONDECYT grant No. 1120461, respectively. The authors wish to thank Sebastian Osores and Luis Prado for his help with crabs collection and maintenance. All experiments were conducted according to current Chilean law.

## References

- Addo-Bediako, A., Chown, S. L. and Gaston, K. J.** (2000). Thermal tolerance, climatic variability and latitude. *Proc. R. Soc. B Biol. Sci.* **267**, 739–745.
- Angilletta, M. J.** (2006). Estimating and comparing thermal performance curves. *J. Therm. Biol.* **31**, 541–545.
- Angilletta, M. J.** (2009). *Thermal Adaptation: A Theoretical and Empirical Synthesis*. Oxford: Oxford University Press, USA.
- Angilletta, M. J., Niewiarowski, P. H. and Navas, C. A.** (2002). The evolution of thermal physiology in ectotherms. *J. Therm. Biol.* **27**, 249–268.
- Aravena, G., Broitman, B. and Stenseth, N. C.** (2014). Twelve years of change in coastal upwelling along the central-northern coast of Chile: spatially heterogeneous responses to climatic variability. *PLoS One* **9**, e90276.
- Bacigalupe, L. D., Araya, N. M., Carter, M. J., Catalána, T. P., Lardies, M. A. and Bozinovic, F.** (2007). Maternal effects, maternal body size and offspring energetics: A study in the common woodlouse *Porcellio laevis*. *Comp. Biochem. Physiol. Part A Mol. Integr. Physiol.* **147**, 349–354.
- Barria, A. M., Lardies, M. a., Beckerman, A. P. and Bacigalupe, L. D.** (2013). Latitude or biogeographic breaks? Determinants of phenotypic (co)variation in fitness-related traits in *Betaeus truncatus* along the Chilean coast. *Mar. Biol.* **161**, 111–118.
- Barros, V. and Silvestri, G.** (2002). The relation between sea surface temperature at the subtropical south-central Pacific and precipitation in southeastern South America. *J. Clim.* **15**, 251–267.
- Bates, D., Maechler, M., Bolker, B., Walker, S., Christensen, R. and Singmann, H.** (2013). Package “lme 4.”
- Brante, A., Fernández, M. and Viard, F.** (2009). Phylogeography and biogeography concordance in the marine gastropod *Crepidula dilatata* (Calyptaeidae) along the southeastern Pacific coast. *J. Hered.* **103**, 630–7.
- Broitman, B., Navarrete, S., Smith, F. and Gaines, S.** (2001). Geographic variation of southeastern Pacific intertidal communities. *Mar. Ecol. Prog. Ser.* **224**, 21–34.
- Bruning, A., Gonzalez, A., Gaitan-Espitia, J. D., Bartheld, J. L., Toader-Williams, A., Mondaca, F. and Nespolo, R. F.** (2013). Energy Metabolism, Heart Rate and

- Physiological Differentiation in the Pulmonate Gastropod *Cornu Aspersum*. *J. Molluscan Stud.* 1–6.
- Calosi, P., Bilton, D. T., Spicer, J. I., Votier, S. C. and Atfield, A.** (2010). What determines a species' geographical range? Thermal biology and latitudinal range size relationships in European diving beetles (Coleoptera: Dytiscidae). *J. Anim. Ecol.* **79**, 194–204.
- Camus, P. A.** (2001). Biogeografía marina de Chile continental. *Rev. Chil. Hist. Nat.* **74**, 587–617.
- Cano, J. M. and Nicleza, a. G.** (2006). Temperature, metabolic rate, and constraints on locomotor performance in ectotherm vertebrates. *Funct. Ecol.* **20**, 464–470.
- Castañeda, L. E., Lardies, M. A. and Bozinovic, F.** (2004). Adaptive latitudinal shifts in the thermal physiology of a terrestrial isopod. *Evol. Ecol. Res.* **6**, 1–15.
- Castañeda, L. E., Lardies, M. A. and Bozinovic, F.** (2005). Interpopulational variation in recovery time from chill coma along a geographic gradient: a study in the common woodlouse, *Porcellio laevis*. *J. Insect Physiol.* **51**, 1346–51.
- Chown, S. L., Gaston, K. J. and Robinson, D.** (2004). Macrophysiology: large-scale patterns in physiological traits and their ecological implications. *Funct. Ecol.* **18**, 159–167.
- Conover, D. O., Duffy, T. a and Hice, L. a** (2009). The covariance between genetic and environmental influences across ecological gradients: reassessing the evolutionary significance of countergradient and cgradient variation. *Ann. N. Y. Acad. Sci.* **1168**, 100–29.
- Deutsch, C. A., Tewksbury, J. J., Huey, R. B., Sheldon, K. S., Ghalambor, C. K., Haak, D. C. and Martin, P. R.** (2008a). Impacts of climate warming on terrestrial ectotherms across latitude. *Proc. Natl. Acad. Sci.* **105**, 6668–6672.
- Deutsch, C. A., Tewksbury, J. J., Huey, R. B., Sheldon, K. S., Ghalambor, C. K., Haak, D. C. and Martin, P. R.** (2008b). Impacts of climate warming on terrestrial ectotherms across latitude Thermal Safety margin. *PNAS* **105**, 6668–6672.
- Falvey, M. and Garreaud, R. D.** (2009). Regional cooling in a warming world: Recent temperature trends in the southeast Pacific and along the west coast of subtropical South America (1979–2006). *J. Geophys. Res.* **114**, D04102.
- Faulkner, K. T., Clusella-Trullas, S., Peck, L. S. and Chown, S. L.** (2014). Lack of coherence in the warming responses of marine crustaceans. *Funct. Ecol.* **28**, 895–903.
- Gaitán-Espitia, J. D., Arias, M. B., Lardies, M. A. and Nespolo, R. F.** (2013). Variation in Thermal Sensitivity and Thermal Tolerances in an Invasive Species across a Climatic Gradient: Lessons from the Land Snail *Cornu aspersum*. *PLoS One* **8**, e70662.
- Gardiner, N. M., Munday, P. L. and Nilsson, G. E.** (2010). Counter-gradient variation in respiratory performance of coral reef fishes at elevated temperatures. *PLoS One* **5**, e13299.
- Ghalambor, C. K., Huey, R. B., Martin, P. R., Tewksbury, J. J. and Wang, G.** (2006). Are mountain passes higher in the tropics? Janzen's hypothesis revisited. *Integr. Comp. Biol.* **46**, 5–17.

- Gilchrist, G. W.** (1996). A quantitative genetic analysis of thermal sensitivity in the locomotor performance curve of *Aphidius ervi*. *Evolution (N. Y.)* **50**, 1560–1572.
- Haye, P. A., Segovia, N. I., Muñoz-Herrera, N. C., Gálvez, F. E., Martínez, A., Meynard, A., Pardo-Gandarillas, M. C., Poulin, E. and Faugeron, S.** (2014). Phylogeographic structure in benthic marine invertebrates of the southeast pacific coast of chile with differing dispersal potential. *PLoS One* **9**, e88613.
- Helmuth, B. S. T. and Hofmann, G. E.** (2001). Microhabitats, Thermal Heterogeneity, and Patterns of Physiological Stress in the Rocky Intertidal Zone. *Biol. Bull.* **201**, 374–384.
- Helmuth, B., Harley, C. D. G., Halpin, P. M., O'Donnell, M., Hofmann, G. E. and Blanchette, C. A.** (2002). Climate change and latitudinal patterns of intertidal thermal stress. *Science (80-. )*. **298**, 1015–7.
- Helmuth, B., Broitman, B., Blanchette, C., Sarah, G., Halpin, P., Harley, C., O'Donnell, M., Hofmann, G. E., Menge, B. and Strickland, D.** (2006). Mosaic patterns of thermal stress in the rocky intertidal zone: implications for climate change. *Ecol. Monogr.* **76**, 461–479.
- Hochachka, P. and Somero, G.** (2002). *Biochemical adaptation: mechanism and process in physiological evolution*. New York: Oxford University Press Inc.
- Hoffmann, A. A., Chown, S. L. and Clusella-Trullas, S.** (2013). Upper thermal limits in terrestrial ectotherms: how constrained are they? *Funct. Ecol.* **27**, 934–949.
- Hofmann, G. E. and Todgham, A. E.** (2010). Living in the now: physiological mechanisms to tolerate a rapidly changing environment. *Annu. Rev. Physiol.* **72**, 127–45.
- Huey, R. B. and Berrigan, D.** (2001). Temperature, demography, and ectotherm fitness. *Am. Nat.* **158**, 204–10.
- Huey, R. B. and Kingsolver, J. G.** (1989). Evolution of thermal sensitivity of ectotherm performance. *Trends Ecol. Evol.* **4**, 131–5.
- Huey, R. and Kingsolver, J.** (1993). Evolution of resistance to high temperature in ectotherms. *Am. Nat.* **142**, S21–S46.
- Huey, R. B., Crill, W., Kingsolver, J. G. and Weber, K.** (1992). A method for rapid measurement of heat or cold resistance of small insects. *Funct. Ecol.* **6**, 489–494.
- Huey, R. B., Berrigan, D. and Gilchrist, G. W.** (1999). Testing the adaptive significance of acclimation: a strong inference approach. *Am. Zool.* **39**, 323–336.
- IPCC** (2013). *Climate Change 2013: The Physical Science Basis. Working Group I Contribution to the Fifth Assessment Report (AR5) of the IPCC*. (ed. Solomon, S., Qin, D., Manning, M., Chen, Z., Marquis, M., Averyt, K. B., Tignor, M., and Miller, H. L.) Cambridge, United Kingdom and New York, NY, USA: Cambridge University Press.
- Janzen, D. H.** (1967). Why mountain passes are higher in the tropics. *Am. Nat.* **101**, 233–249.
- Keller, I. and Seehausen, O.** (2012). Thermal adaptation and ecological speciation. *Mol. Ecol.* **21**, 782–799.
- Kingsolver, J. G.** (2009). The well-temperated biologist. (American Society of Naturalists Presidential Address). *Am. Nat.* **174**, 755–68.

- Kingsolver, J. G. and Gomulkiewicz, R.** (2003). Environmental variation and selection on performance curves. *Integr. Comp. Biol.* **43**, 470–7.
- Kingsolver, J. G. and Huey, R. B.** (2008). Size , temperature , and fitness: three rules. *Differences* **10**, 251–268.
- Kingsolver, J. G. and Massie, K. R.** (2007). Relating environmental variation to selection on reaction norms: an experimental test. *Am. ...* **169**, 163–74.
- Knies, J. L., Kingsolver, J. G. and Burch, C. L.** (2009). Hotter is better and broader: thermal sensitivity of fitness in a population of bacteriophages. *Am. Nat.* **173**, 419–30.
- Kuo, E. and Sanford, E.** (2009). Geographic variation in the upper thermal limits of an intertidal snail: implications for climate envelope models. *Mar. Ecol. Prog. Ser.* **388**, 137–146.
- Lachenicht, M. W., Clusella-Trullas, S., Boardman, L., Le Roux, C. and Terblanche, J. S.** (2010). Effects of acclimation temperature on thermal tolerance, locomotion performance and respiratory metabolism in *Acheta domesticus* L. (Orthoptera: Gryllidae). *J. Insect Physiol.* **56**, 822–30.
- Lagos, N. A., Navarrete, S. A., Véliz, F., Masuero, A. and Castilla, J. C.** (2005). Meso-scale spatial variation in settlement and recruitment of intertidal barnacles along the coast of central Chile. *Mar. Ecol. Prog. Ser.* **290**, 165–178.
- Levinton, J. S.** (1983). The latitudinal compensation hypothesis: growth data and a model of latitudinal growth differentiation based upon energy budgets. I. Interspecific comparison of *Ophryotrocha* (Polychaeta: Dorvilleidae). *Biol. Bull.* **165**, 686.
- Lutterschmidt, W. and Hutchison, V.** (1997). The critical thermal maximum: history and critique. *Can. J. Zool.* **75**, 1561–1574.
- Meneses, I. and Santelices, B.** (2000). Patterns and breaking points in the distribution of benthic algae along the temperate Pacific coast of South America. *Rev. Chil. Hist. Nat.* **73**, 615–623.
- Menge, B. A., Chan, F. and Lubchenco, J.** (2008). Response of a rocky intertidal ecosystem engineer and community dominant to climate change. *Ecol. Lett.* **11**, 151–62.
- Naya, D. E., Catalán, T., Artacho, P., Gaitán-Espitia, J. D. and Nespolo, R. F.** (2011). Exploring the functional association between physiological plasticity , climatic variability, and geographical latitude: lessons from land snails. *Evol. Ecol. Res.* **13**, 1–13.
- Pörtner, H. O.** (2002). Climate variations and the physiological basis of temperature dependent biogeography: systemic to molecular hierarchy of thermal tolerance in animals. *Comp. Biochem. Physiol. Part A Mol. Integr. Physiol.* **132**, 739–761.
- Pörtner, H. O., Van Dijk, P. L. M., Hardewig, I. and Sommer, A.** (2000). Levels of Metabolic Cold Adaptation: Tradeoffs in Eurythermal and Stenothermal Ectotherms. In *Antarctic Ecosystems: Models for Wider Ecological Understanding* (ed. Davison, W., Williams, C. , and Broady, P.), pp. 109–122. Christchurch: Caxton Press.
- Rivadeneira, M. M., Fernández, M. and Navarrete, S. A.** (2002). Latitudinal trends of species diversity in rocky intertidal herbivore assemblages: spatial scale

- and the relationship between local and regional species richness. *Mar. Ecol. Prog. Ser.* **245**, 123–131.
- Sánchez, R., Sepúlveda, R., Brante, a and Cárdenas, L.** (2011). Spatial pattern of genetic and morphological diversity in the direct developer *Acanthina monodon* (Gastropoda: Mollusca). *Mar. Ecol. Prog. Ser.* **434**, 121–131.
- Schulte, P. M., Healy, T. M. and Fangue, N. A.** (2011). Thermal performance curves, phenotypic plasticity, and the time scales of temperature exposure. *Integr. Comp. Biol.* **51**, 691–702.
- Somero, G.** (2005). Linking biogeography to physiology: Evolutionary and acclimatory adjustments of thermal limits. *Front. Zool.* **2**, 1.
- Stevens, G. C.** (1989). The latitudinal gradient in geographical range: how so many species coexist in the tropics. *Am. Nat.* **133**, 240–256.
- Stillman, J. H.** (2002). Causes and consequences of thermal tolerance limits in rocky intertidal porcelain crabs, genus *Petrolisthes*. *Integr. Comp. Biol.* **42**, 790–6.
- Stillman, J. H.** (2003). Acclimation capacity underlies susceptibility to climate change. *Science (80-. )*. **301**, 65.
- Stillman, J. H.** (2004). A comparative analysis of plasticity of thermal limits in porcelain crabs across latitudinal and intertidal zone clines. *Int. Congr. Ser.* **1275**, 267–274.
- Stillman, J. H. and Tagmount, A.** (2009). Seasonal and latitudinal acclimatization of cardiac transcriptome responses to thermal stress in porcelain crabs, *Petrolisthes cinctipes*. *Mol. Ecol.* **18**, 4206–26.
- Stitt, B. C., Burness, G., Burgomaster, K. a, Currie, S., McDermid, J. L. and Wilson, C. C.** (2014). Intraspecific Variation in Thermal Tolerance and Acclimation Capacity in Brook Trout (*Salvelinus fontinalis*): Physiological Implications for Climate Change. *Physiol. Biochem. Zool.* **87**, 15–29.
- Sunday, J. M., Bates, A. E. and Dulvy, N. K.** (2010). Global analysis of thermal tolerance and latitude in ectotherms. *Proc. R. Soc. B Biol. Sci.* **278**, 1823–30.
- Sunday, J. M., Bates, a. E., Kearney, M. R., Colwell, R. K., Dulvy, N. K., Longino, J. T. and Huey, R. B.** (2014). Thermal-safety margins and the necessity of thermoregulatory behavior across latitude and elevation. *Proc. Natl. Acad. Sci.* 201316145.
- Thiel, M., Macaya, E. C., Acuña, E., Arntz, W. E., Bastias, H., Brokordt, K., Camus, P. A., Castilla, J. C., Castro, L. R., Cortés, M., et al.** (2007). The Humboldt Current System of Northern and Central Chile: oceanographic processes, ecological interactions and socioeconomic feedback. *Oceanogr. Mar. Biol. An Annu. Rev.* **45**, 195–344.
- Torres, R., Pantoja, S., Harada, N., González, H. E., Daneri, G., Frangopulos, M., Rutllant, J. a., Duarte, C. M., Rúa-Halpern, S., Mayol, E., et al.** (2011). Air-sea CO<sub>2</sub> fluxes along the coast of Chile: From CO<sub>2</sub> outgassing in central northern upwelling waters to CO<sub>2</sub> uptake in southern Patagonian fjords. *J. Geophys. Res.* **116**, C09006.
- Vargas, M. A., Lagos, M. E., Contreras, D. A. and Cáceres, C. W.** (2010). Área de estructuras respiratorias y su efecto en la regulación del equilibrio ácido-base

- 627 en dos especies de cangrejos porcelánidos intermareales, *Petrolisthes*  
628 *laevigatus* y *Petrolisthes violaceus*. *Rev. Biol. Mar. y Oceanogr.* **45**, 245–253.  
629 **Viviani, C. A.** (1969). Los Porcellanidae (Crustacea Anomura) chilenos. *Beitrage zur*  
630 *Neotropischen Fauna* **6**, 40–56.  
631 **Wilson, R. S.** (2001). Geographic variation in thermal sensitivity of jumping  
632 performance in the frog *Limnodynastes peronii*. *J. Exp. Biol.* **204**, 4227–36.  
633 **Yampolsky, L. Y., Schaer, T. M. M. and Ebert, D.** (2014). Adaptive phenotypic  
634 plasticity and local adaptation for temperature tolerance in freshwater  
635 zooplankton. *Proc. R. Soc. B Biol. Sci.* **281**, 20132744.  
636 **Young, K. M., Cramp, R. L., White, C. R. and Franklin, C. E.** (2011). Influence of  
637 elevated temperature on metabolism during aestivation: implications for  
638 muscle disuse atrophy. *J. Exp. Biol.* **214**, 3782–9.  
639  
640



## FIGURE CAPTIONS

Figure 1. Geographic and environmental gradient along the southeastern Pacific. (a) Study sites along the Chilean coast; (b) Latitudinal variability in SST (mean  $\pm$  SD) from 18 to 46°S estimated using 5 years historical record from July 1999 to July 2004 (Data available at <http://www.podacc.gov>); (c) Latitudinal variability of annual *in situ* SST (mean  $\pm$  SD) recorded at the low intertidal level of the rocky shore platform in the study sites. (d) Coefficient of variation of daily mean *in situ* SST. Absolute maximum (solid line) and minimum (dashed line) *in situ* SST values recorded for the corresponding time period are also showed in each graph.

Figure 2. Thermal sensitivities of the intertidal crab *Petrolisthes violaceus*. (A) Latitudinal comparison of thermal performance curves; TPC for populations of (B) Iquique (20°S), (C) Antofagasta (23°S), (D) Talcaruca (30°S), (E) El Tabo (33°S), (F) Lenga (36°S), (G) Valdivia (39°S) and (H) Chiloé (40°S).

Figure 3. Latitudinal variation in the temperature optimum (A); maximum performance (B); thermal breadth (C); critical minimum (D) and critical maximum (E) of the intertidal crab *Petrolisthes violaceus*. The effect of latitude (fixed effect) was evaluated through confidence intervals computed from the likelihood profile (Bates et al., 2013).

Figure 4. Latitudinal variation in thermal comas (A, Chill coma; B, Heat coma). The effect of latitude (fixed effect) was evaluated through confidence intervals computed from the likelihood profile (Bates et al., 2013).

Figure 5. Geographic variation in (A) warming tolerance (WT) and (B) thermal safety margins of the intertidal crab *Petrolisthes violaceus* along a latitudinal gradient of ca. 3000 km in the Chilean coast.

Table 1. Comparison of functions used to describe the thermal performance curves of *P. violaceus* populations across the latitudinal gradient, using Akaike's information criterion (AIC). The function with the lowest AIC is the one that best describes the data. K = number of parameters in the function,  $\lambda_i$  = difference between a given model's AIC and the lowest AIC,  $w_i$  = Akaike weight. Models in boldface were selected for analyses.

| Population  | Function          | K | AIC   | $\lambda_i$ | $w_i$ | $r^2$ |
|-------------|-------------------|---|-------|-------------|-------|-------|
| Iquique     | <b>Gaussian</b>   | 4 | 51.22 | 0.00        | 0.48  | 0.96  |
|             | Lorentzian        | 4 | 51.43 | 0.21        | 0.43  | 0.96  |
|             | Weibull           | 5 | 54.51 | 3.29        | 0.09  | 0.96  |
| Antofagasta | <b>Gaussian</b>   | 4 | 55.36 | 0.00        | 0.38  | 0.87  |
|             | Lorentzian        | 4 | 55.38 | 0.02        | 0.37  | 0.87  |
|             | Weibull           | 5 | 56.21 | 0.85        | 0.25  | 0.90  |
| Talcaruca   | <b>Lorentzian</b> | 4 | 38.52 | 0.04        | 0.47  | 0.97  |
|             | Gaussian          | 4 | 38.47 | 0.00        | 0.48  | 0.97  |
|             | Weibull           | 5 | 43.20 | 4.73        | 0.05  | 0.96  |
| El Tabo     | <b>Weibull</b>    | 5 | 32.88 | 0.00        | 0.78  | 0.99  |
|             | Lorentzian        | 4 | 36.72 | 3.84        | 0.11  | 0.98  |
|             | Gaussian          | 4 | 36.86 | 3.99        | 0.11  | 0.98  |
| Lenga       | <b>Gaussian</b>   | 4 | 38.13 | 0.00        | 5.24  | 0.98  |
|             | Lorentzian        | 4 | 38.14 | 0.01        | 5.20  | 0.98  |
|             | Weibull           | 5 | 41.44 | 3.31        | 1.00  | 0.98  |
| Valdivia    | <b>Weibull</b>    | 5 | 39.07 | 0.00        | 0.44  | 0.98  |
|             | Gaussian          | 4 | 39.94 | 0.87        | 0.28  | 0.96  |
|             | Lorentzian        | 5 | 39.94 | 0.87        | 0.28  | 0.96  |
| Chiloé      | <b>Gaussian</b>   | 4 | 44.87 | 0.56        | 0.40  | 0.89  |
|             | Lorentzian        | 4 | 44.31 | 0.00        | 0.53  | 0.90  |
|             | Weibull           | 5 | 48.25 | 3.93        | 0.07  | 0.90  |

Table 2. Parameters of thermal performance curves in populations of the porcellanid crab *P. violaceus*. Thermal optimum ( $T_{opt}$ ), thermal breadth ( $T_{br}$ ), maximal performance ( $\mu_{max}$ ), critical temperatures ( $CT_{min}$  and  $CT_{max}$ ), warming tolerance (WT) and thermal safety margin (TSM). (Mean  $\pm$  S.E.M).

| Population         | Latitude           | $CT_{min}$ (°C)  | $CT_{max}$ (°C)  | $T_{opt}$ (°C)   | $\mu_{max}$ | $T_{br}$ | WT    | TSM  |
|--------------------|--------------------|------------------|------------------|------------------|-------------|----------|-------|------|
| <b>Iquique</b>     | 20°19' S, 70°15' W | $-0.74 \pm 0.33$ | $32.31 \pm 0.74$ | $24.43 \pm 0.87$ | 149.93      | 28.74    | 15.49 | 7.61 |
| <b>Antofagasta</b> | 23°46' S, 70°40' W | $-0.75 \pm 0.24$ | $33.46 \pm 0.75$ | $19.08 \pm 0.46$ | 127.51      | 27.81    | 17.06 | 2.69 |
| <b>Talcaruca</b>   | 30°29' S, 71°41' W | $-0.68 \pm 0.18$ | $32.90 \pm 0.68$ | $18.34 \pm 0.27$ | 100.85      | 26.89    | 17.39 | 2.83 |
| <b>El Tabo</b>     | 33°27' S, 71°66' W | $-1.13 \pm 0.27$ | $31.99 \pm 0.74$ | $18.43 \pm 0.27$ | 148.18      | 21.22    | 17.15 | 3.59 |
| <b>Lenga</b>       | 36°45' S, 73°10' W | $-0.84 \pm 0.21$ | $34.23 \pm 0.82$ | $18.98 \pm 0.23$ | 133.24      | 27.51    | 19.54 | 4.29 |
| <b>Valdivia</b>    | 39°46' S, 73°23' W | $-0.52 \pm 0.13$ | $34.31 \pm 0.52$ | $16.98 \pm 0.36$ | 118.31      | 26.59    | 21.72 | 4.39 |
| <b>Chiloé</b>      | 40°52' S, 73°59' W | $-0.68 \pm 0.17$ | $34.38 \pm 0.52$ | $13.32 \pm 0.40$ | 118.52      | 19.65    | 22.12 | 1.06 |

(a)

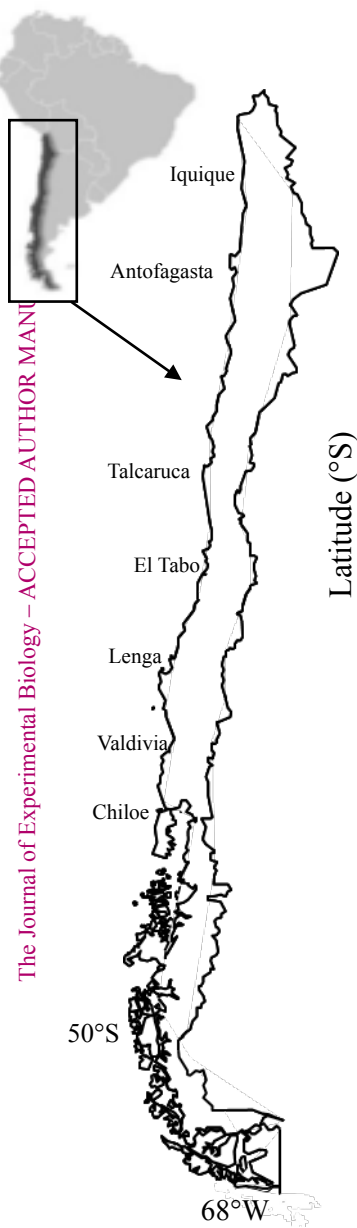

(b)

SST (°C)

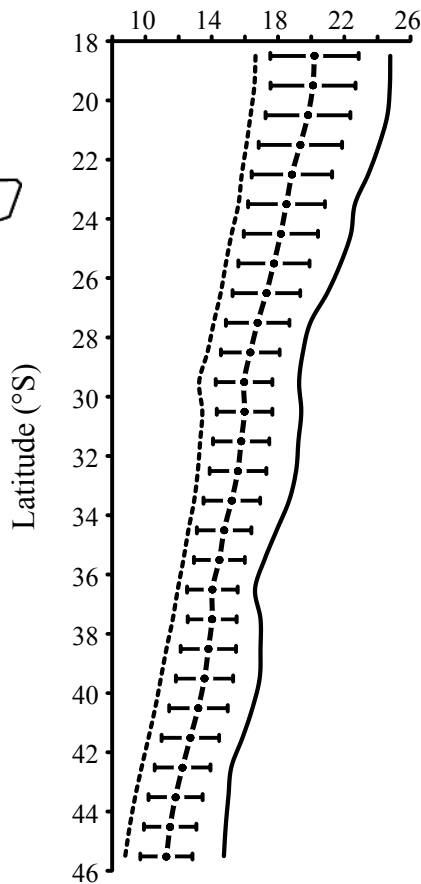

(c)

Annual in situ SST (°C)

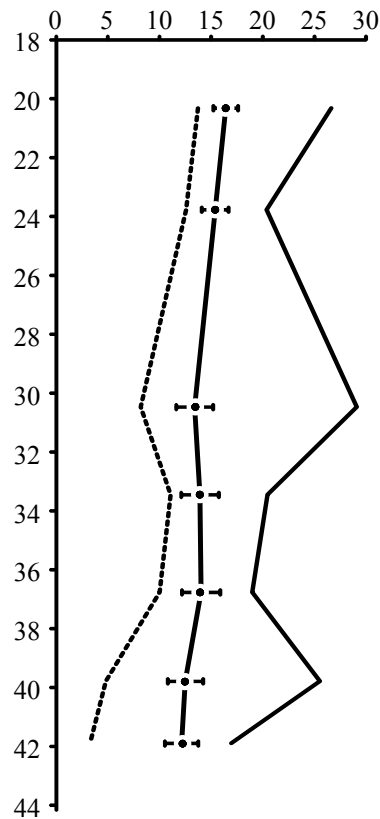

(d)

CV of daily in situ SST (%)

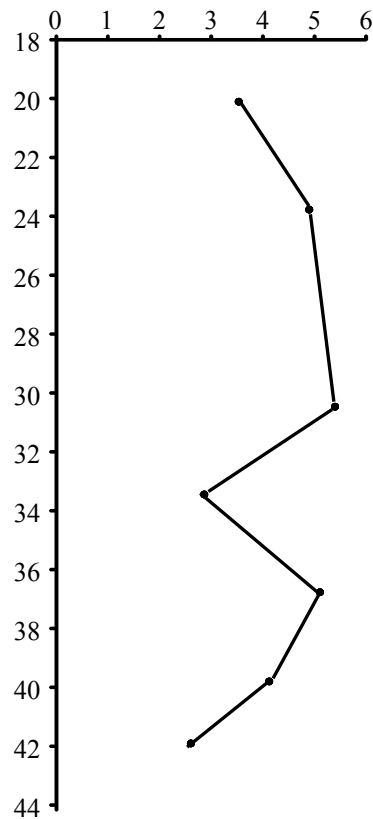

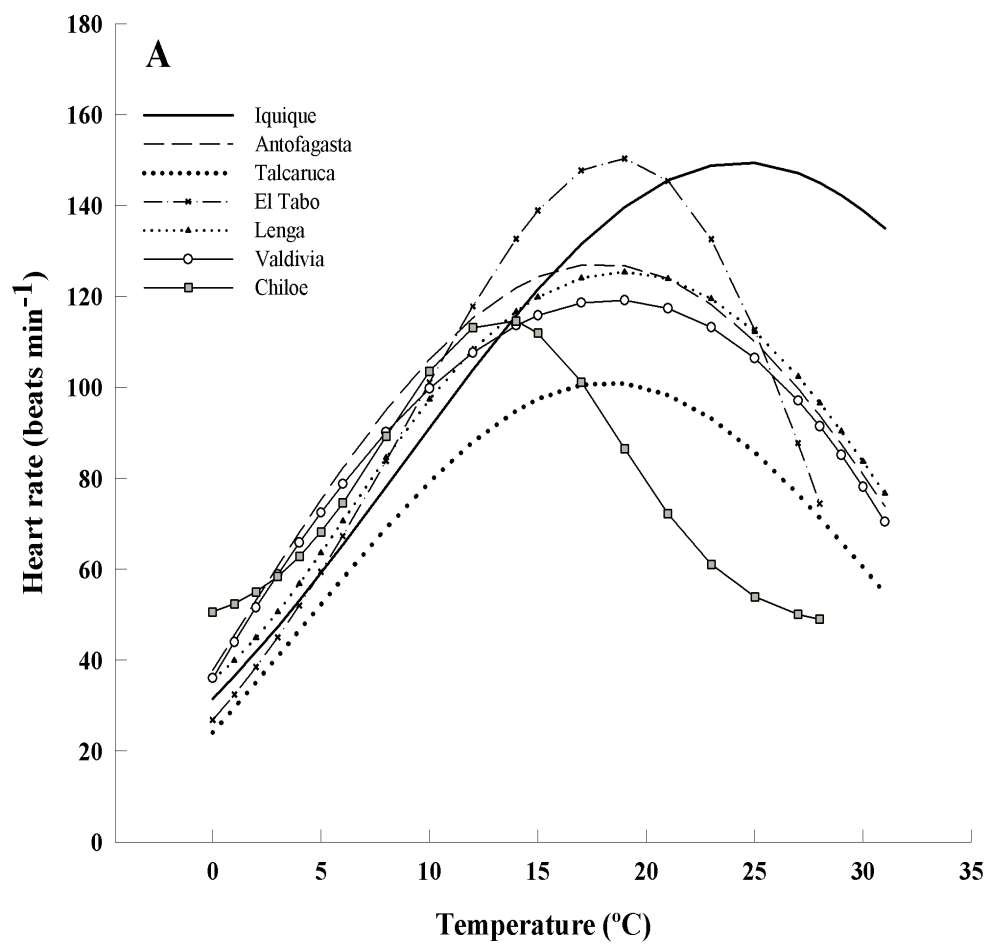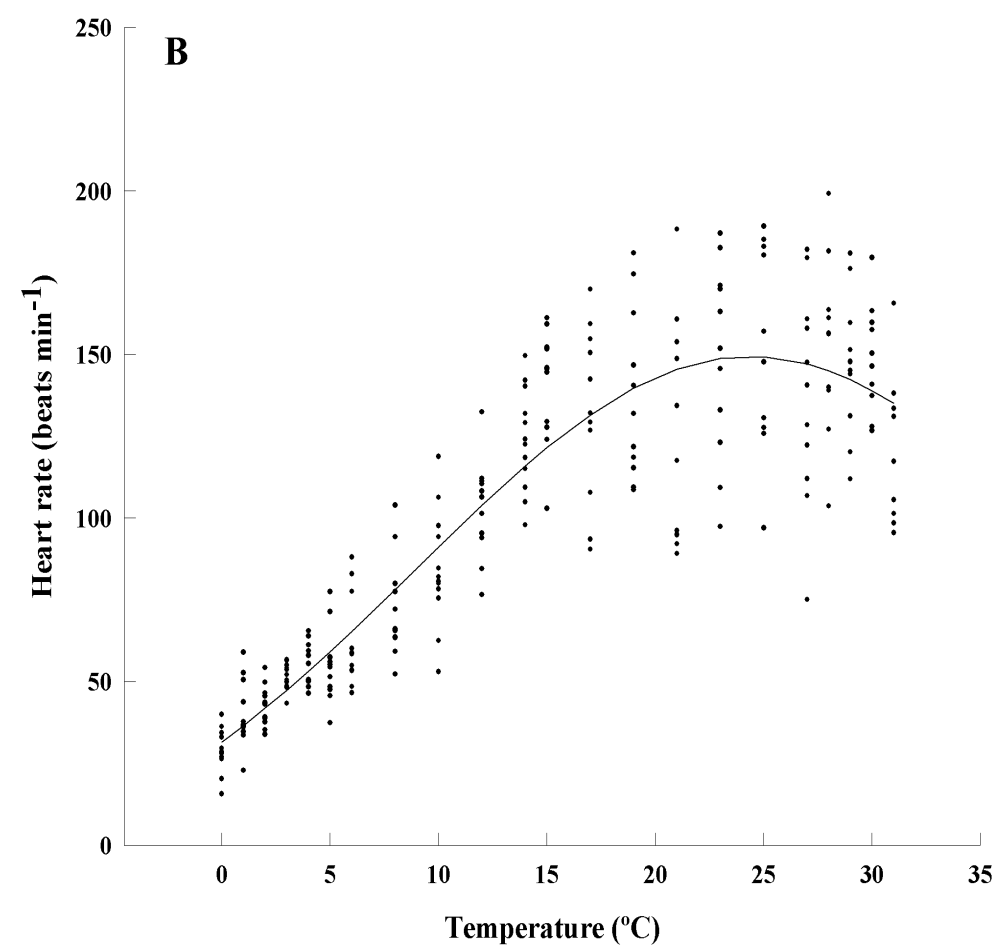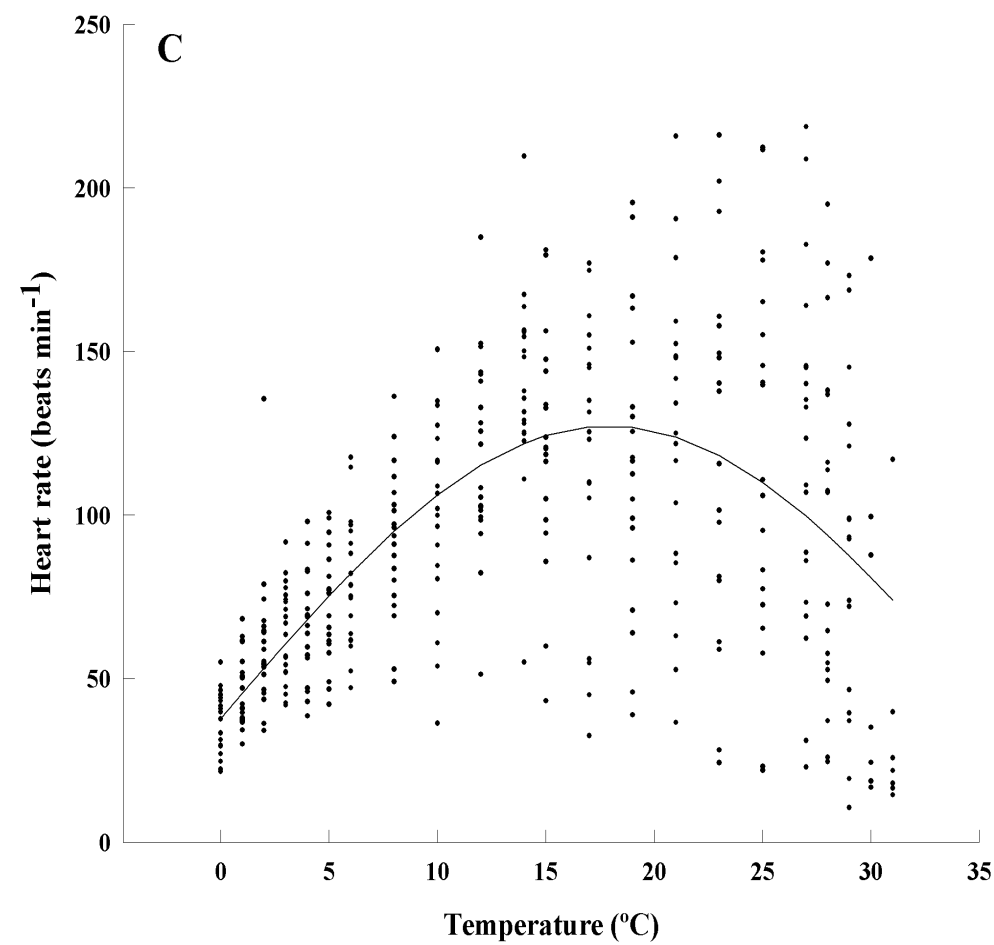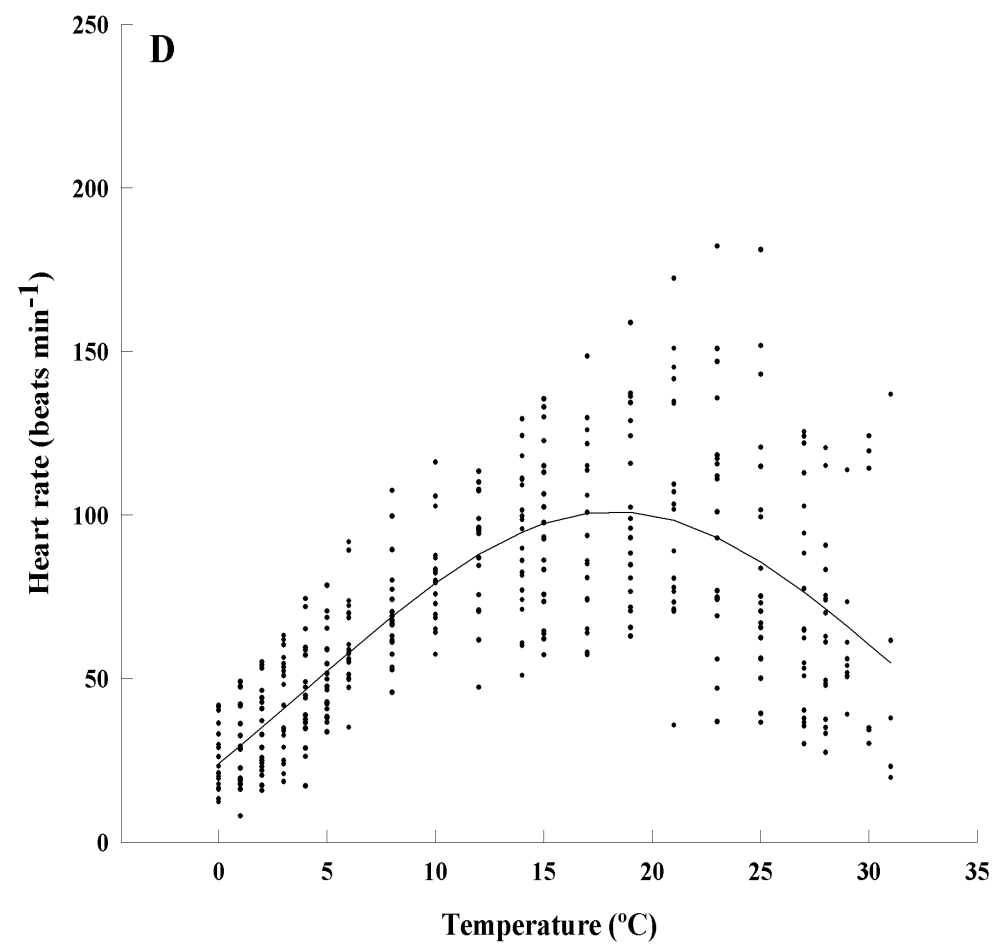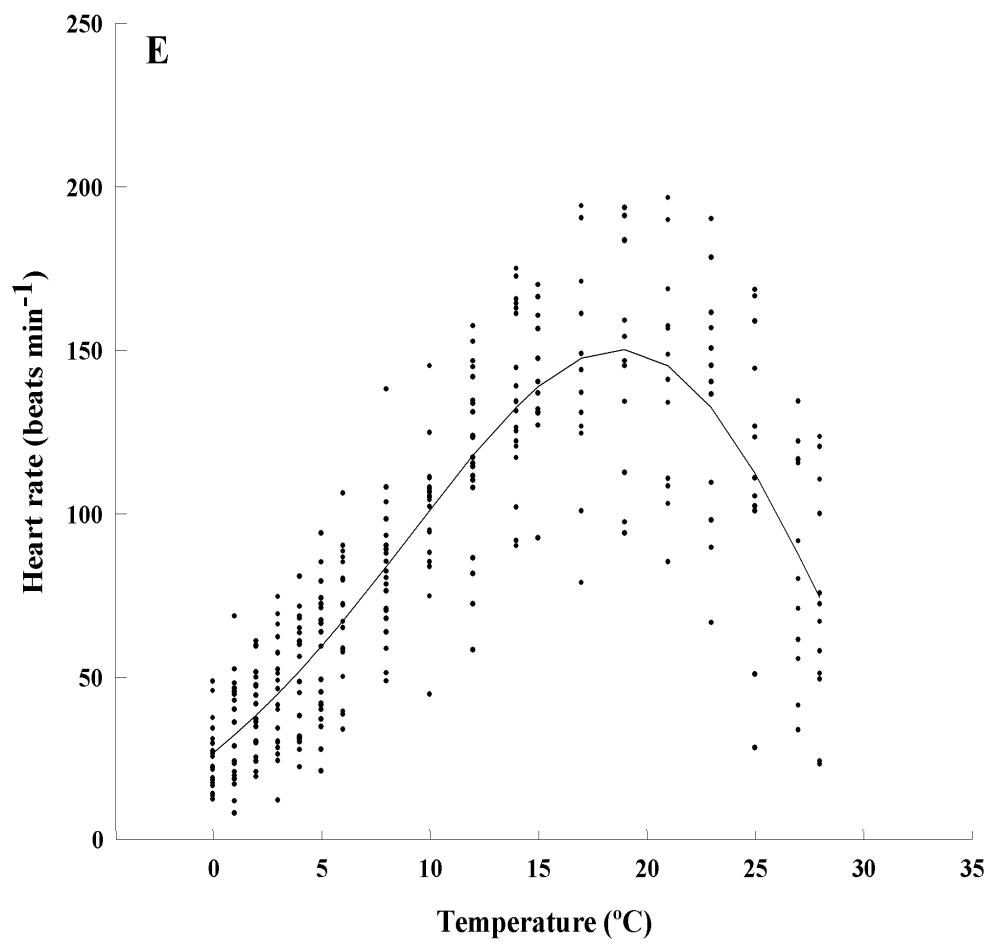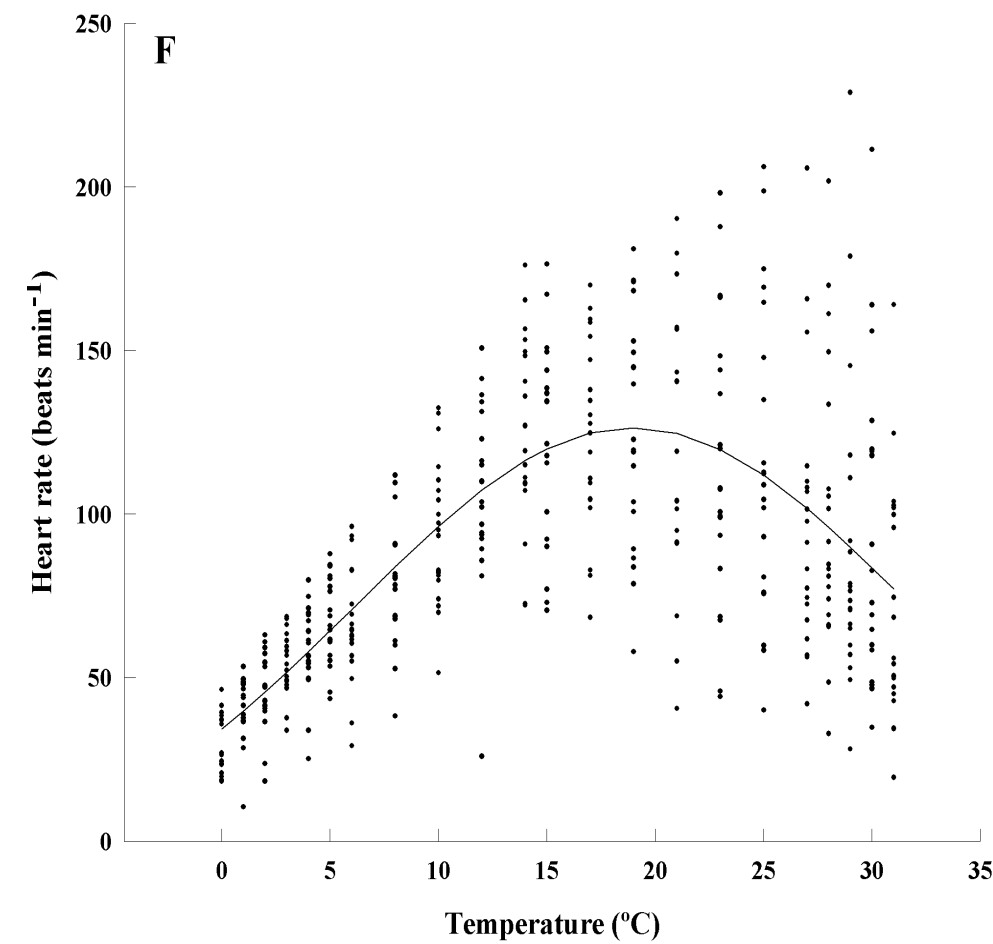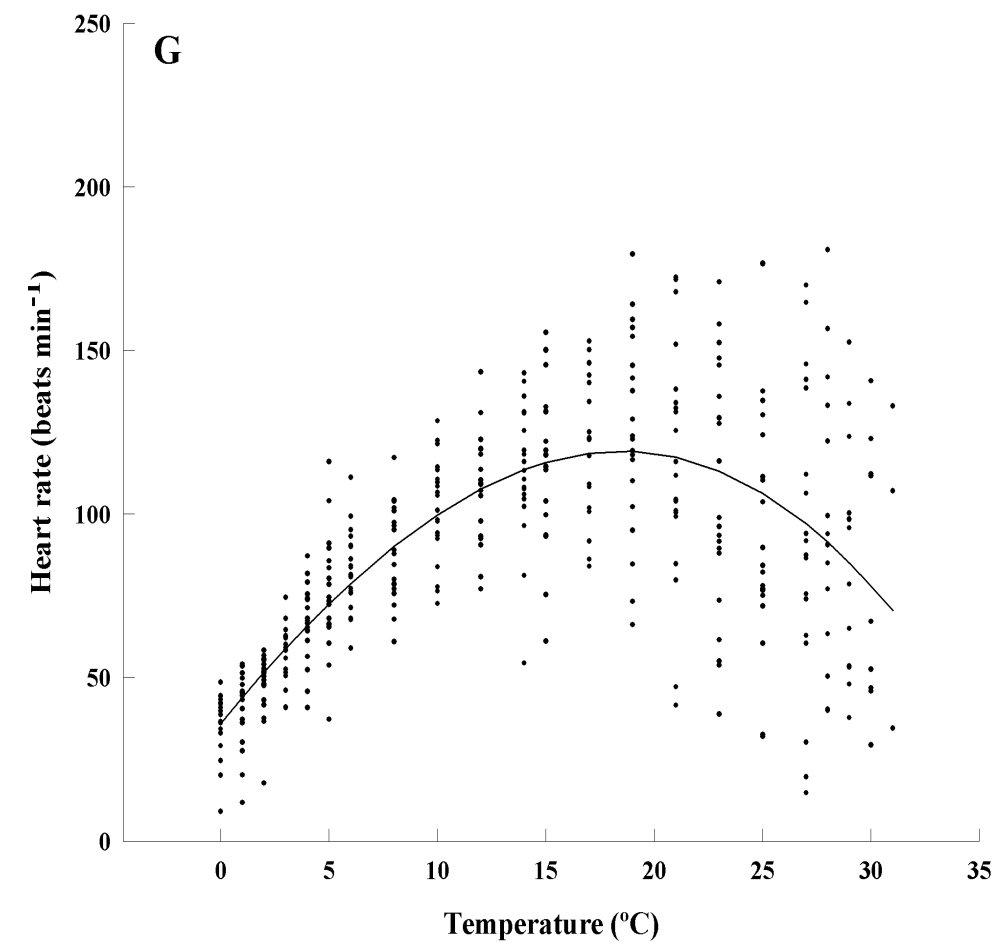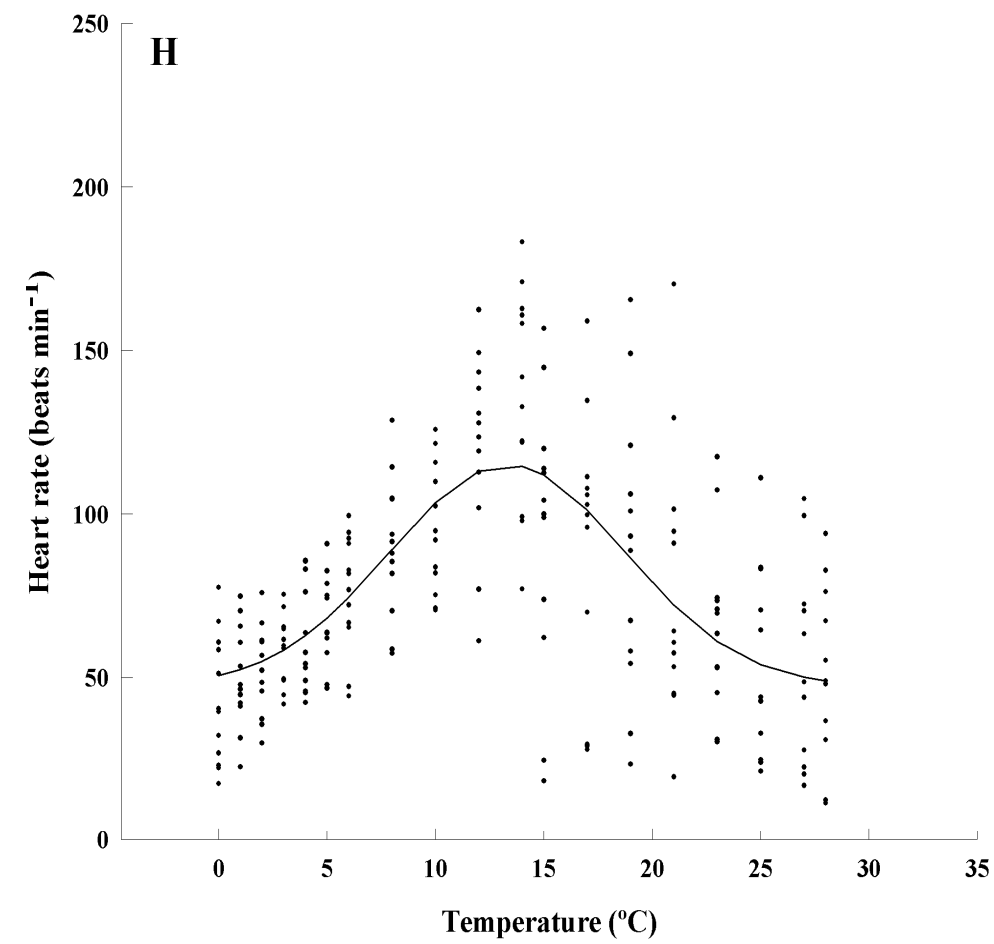

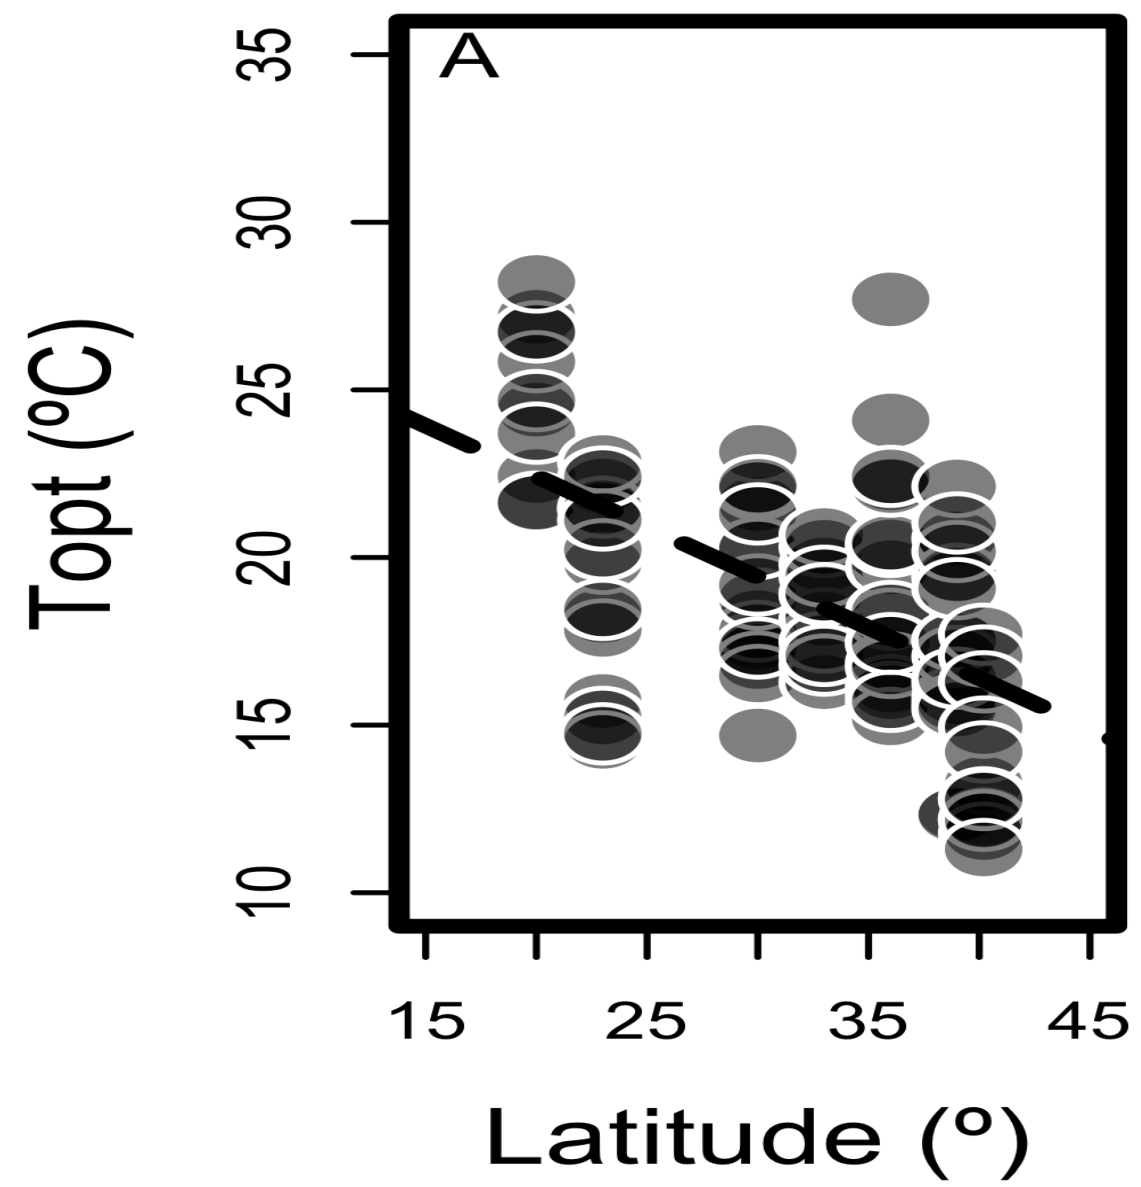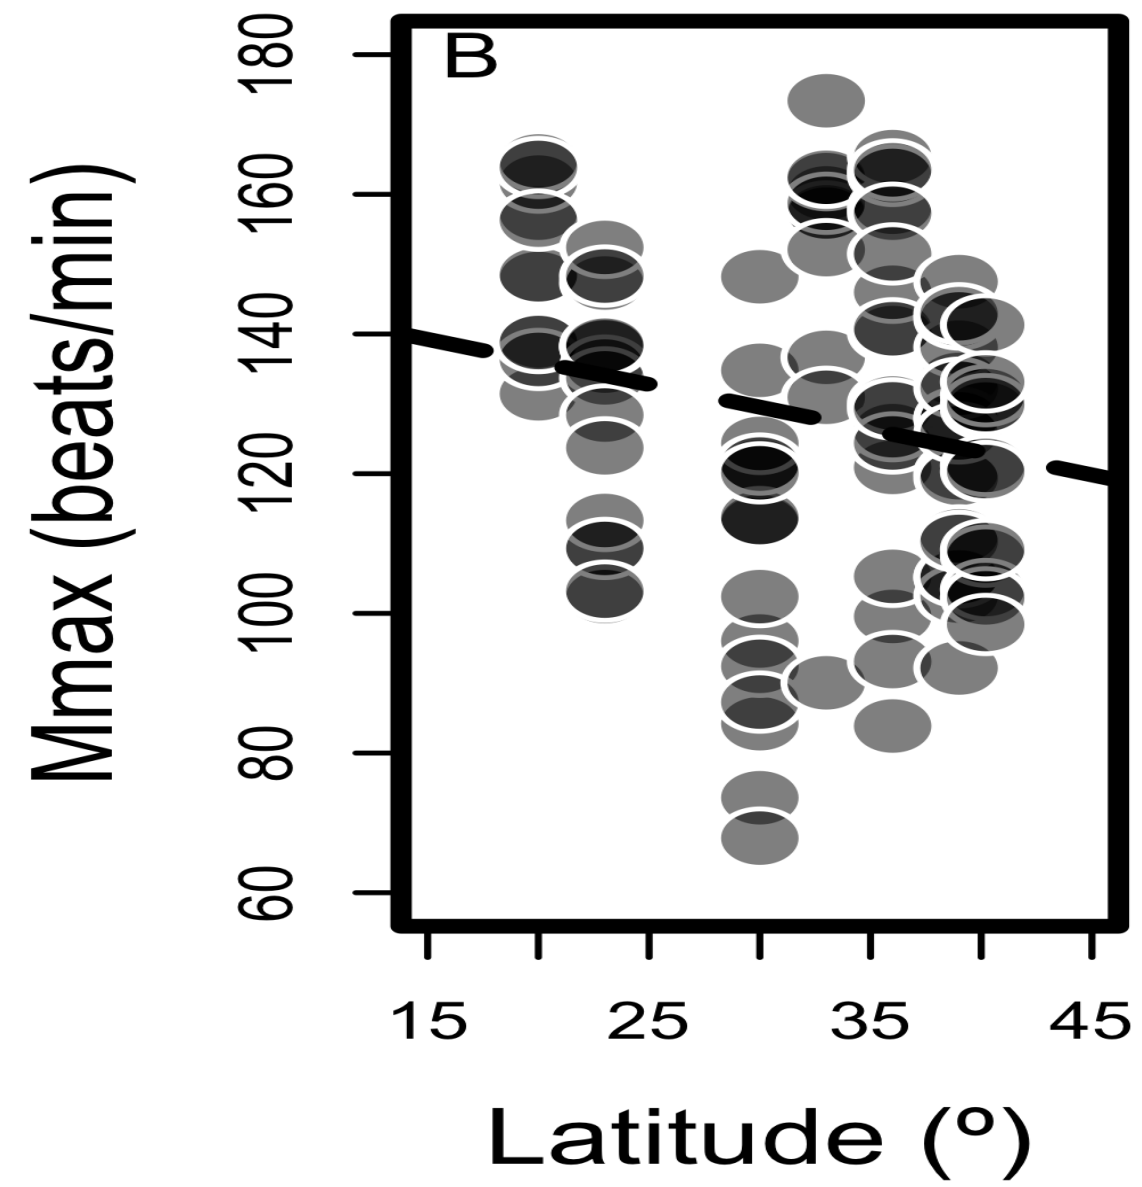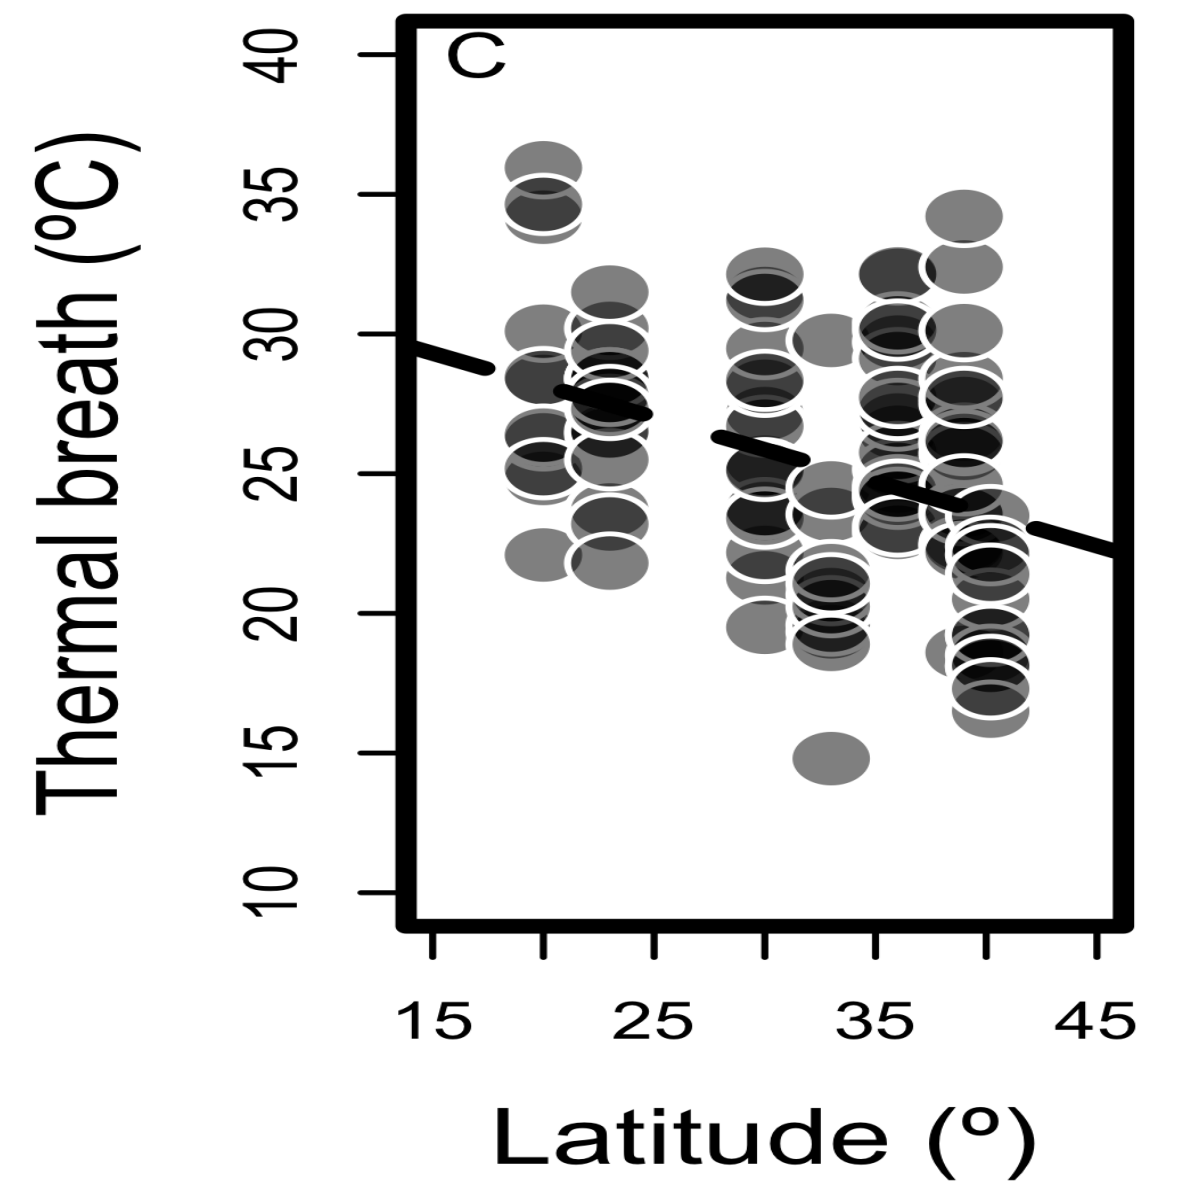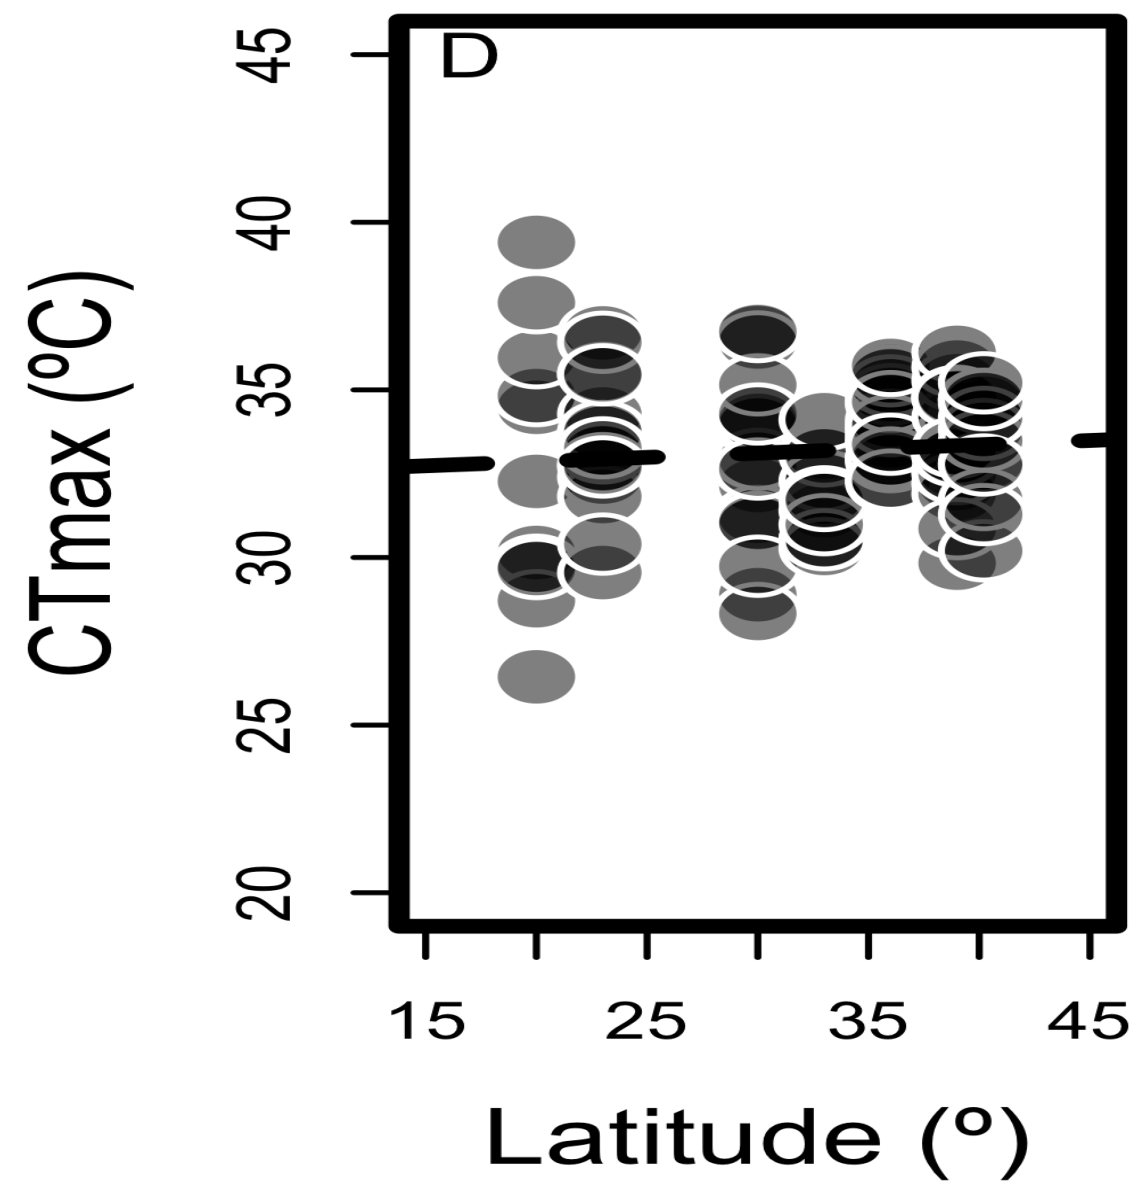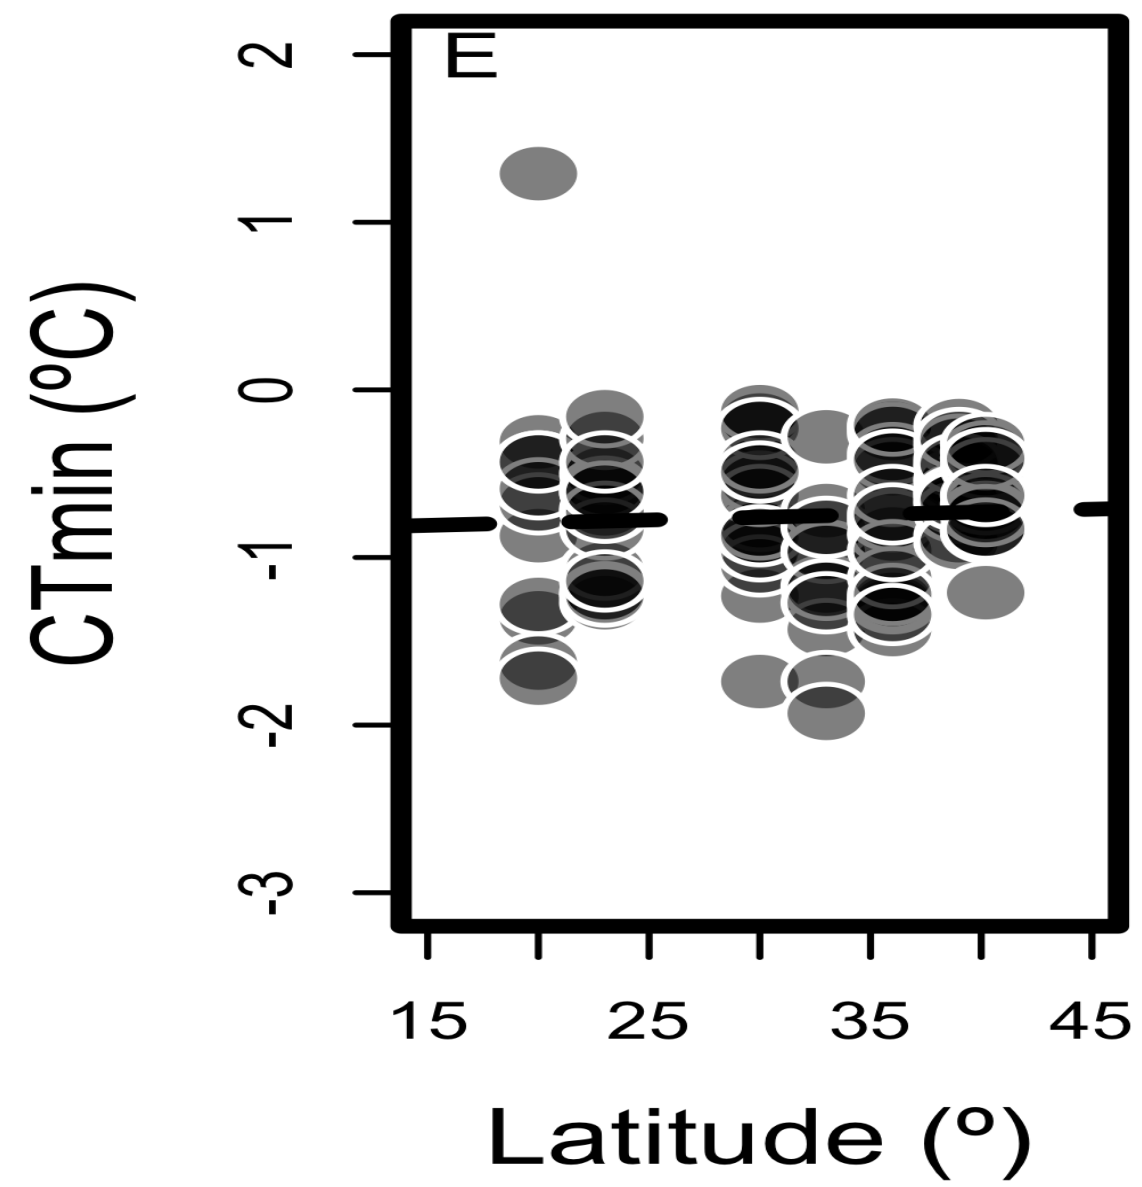

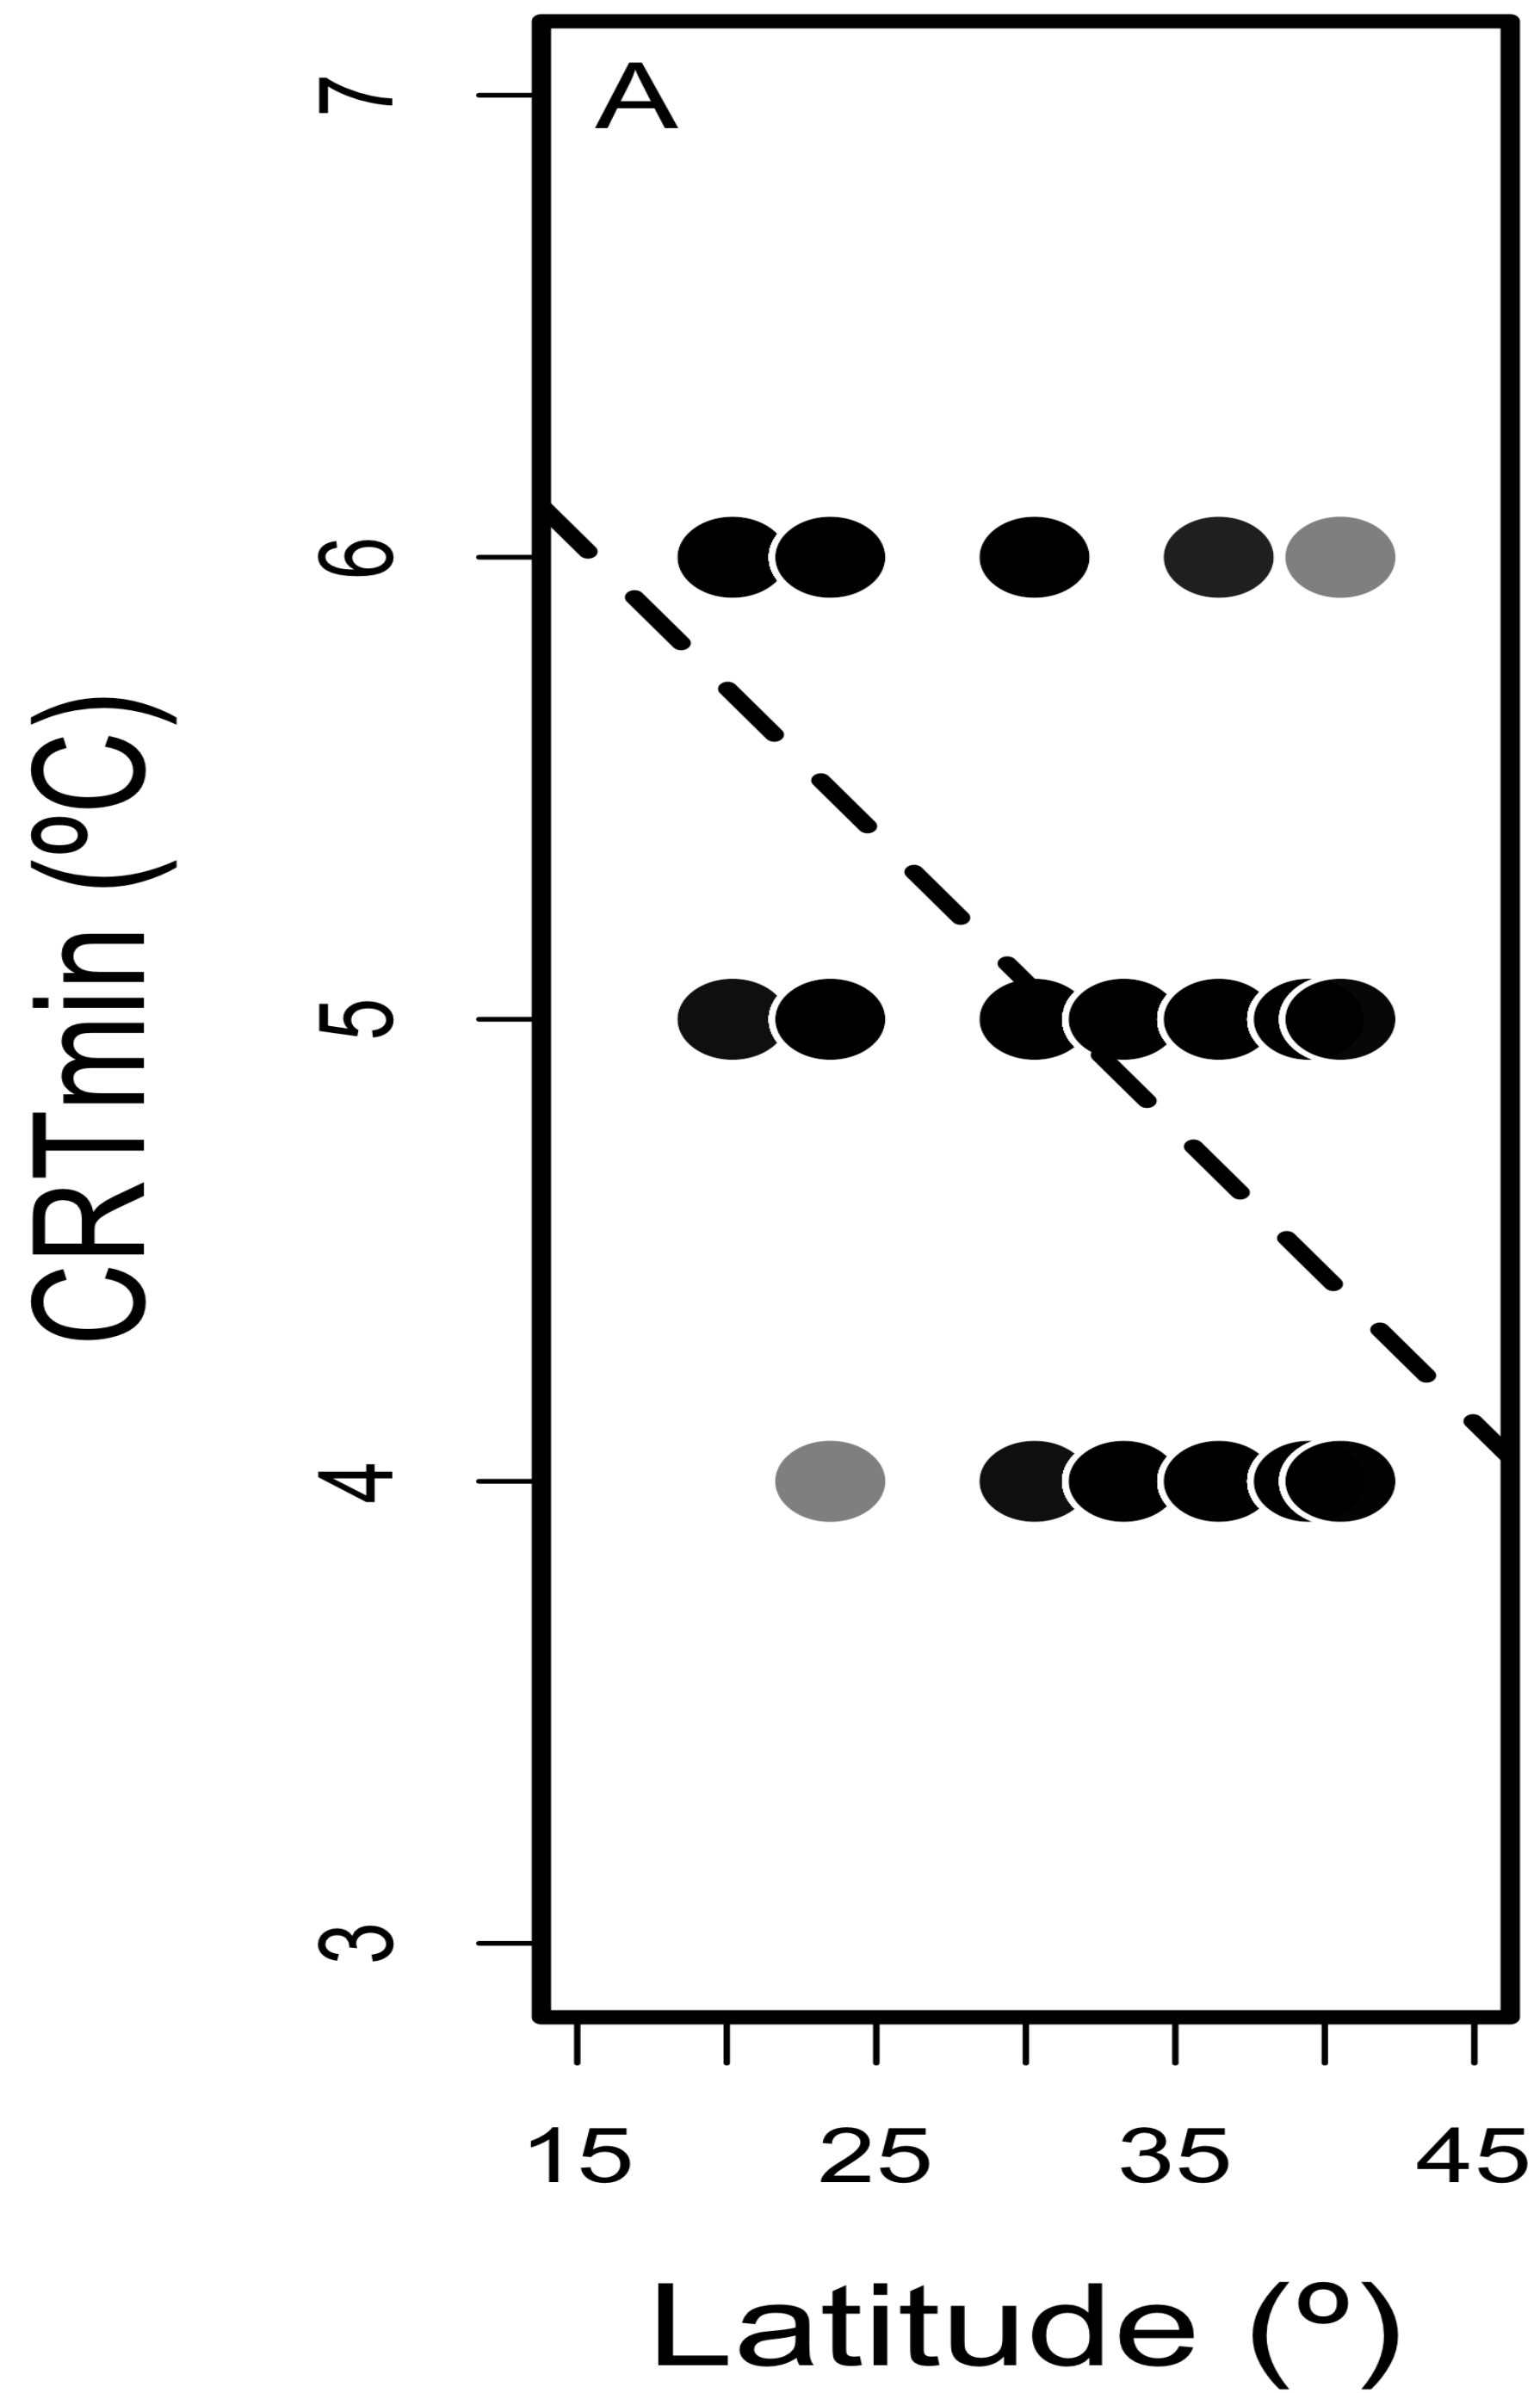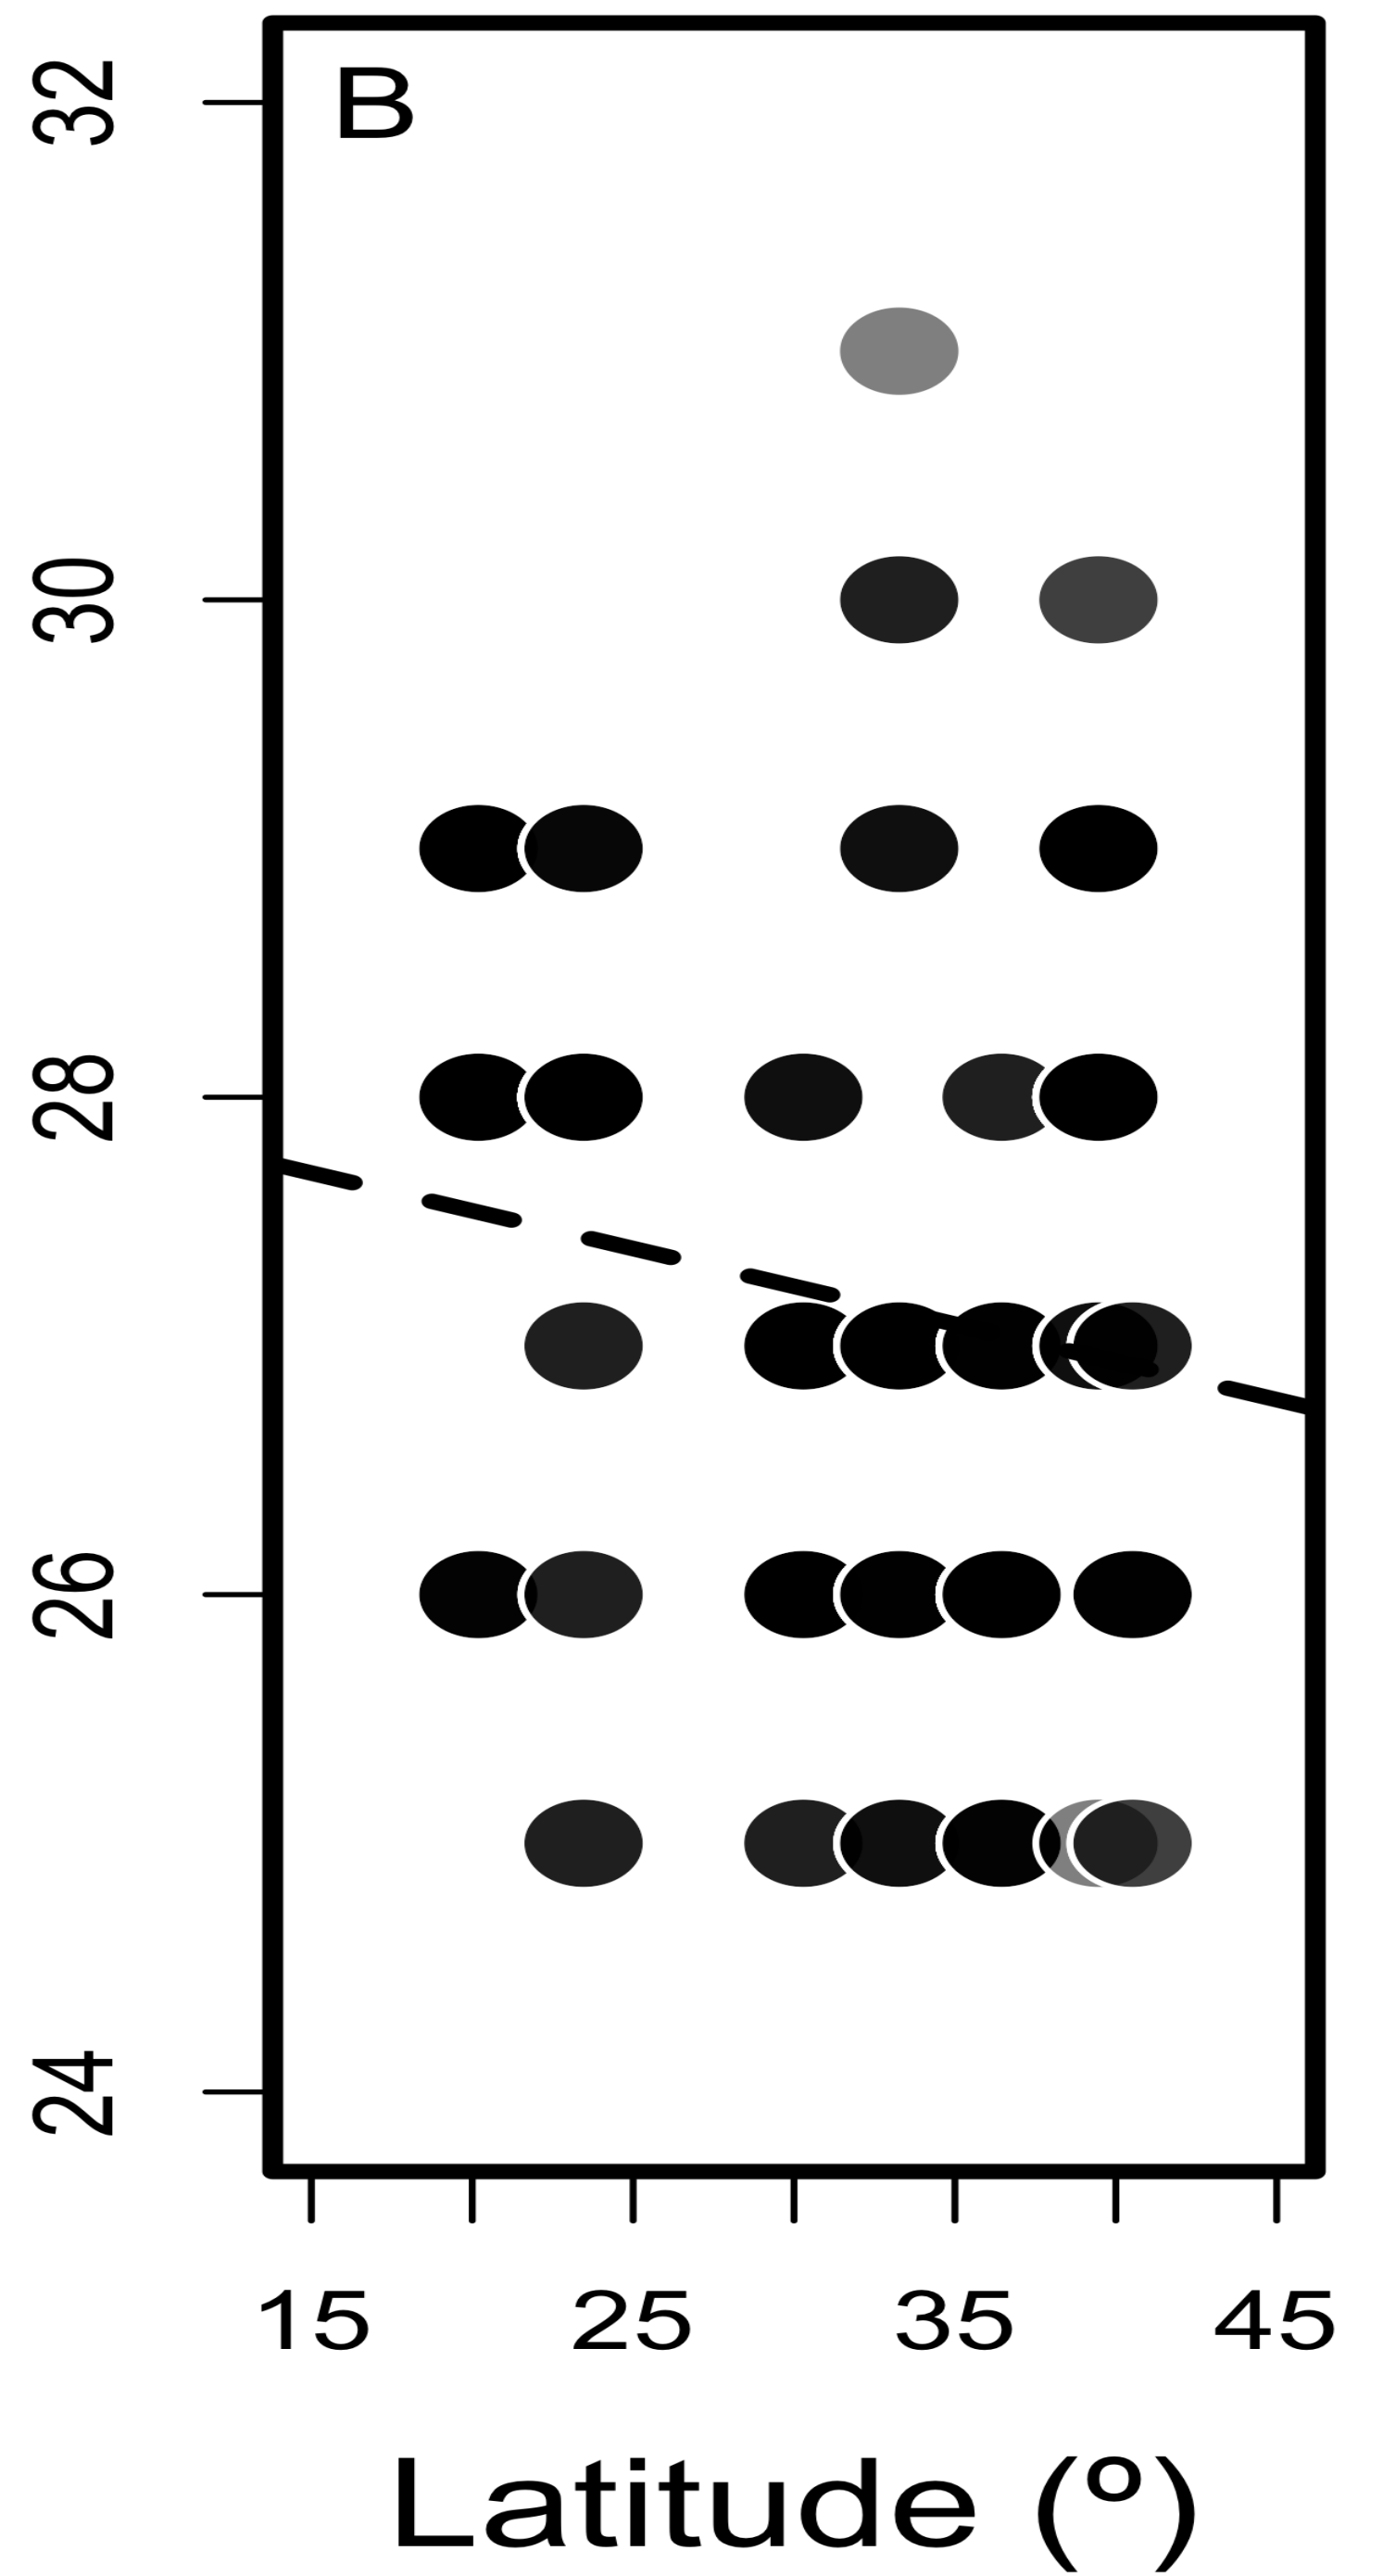

WT (°C)

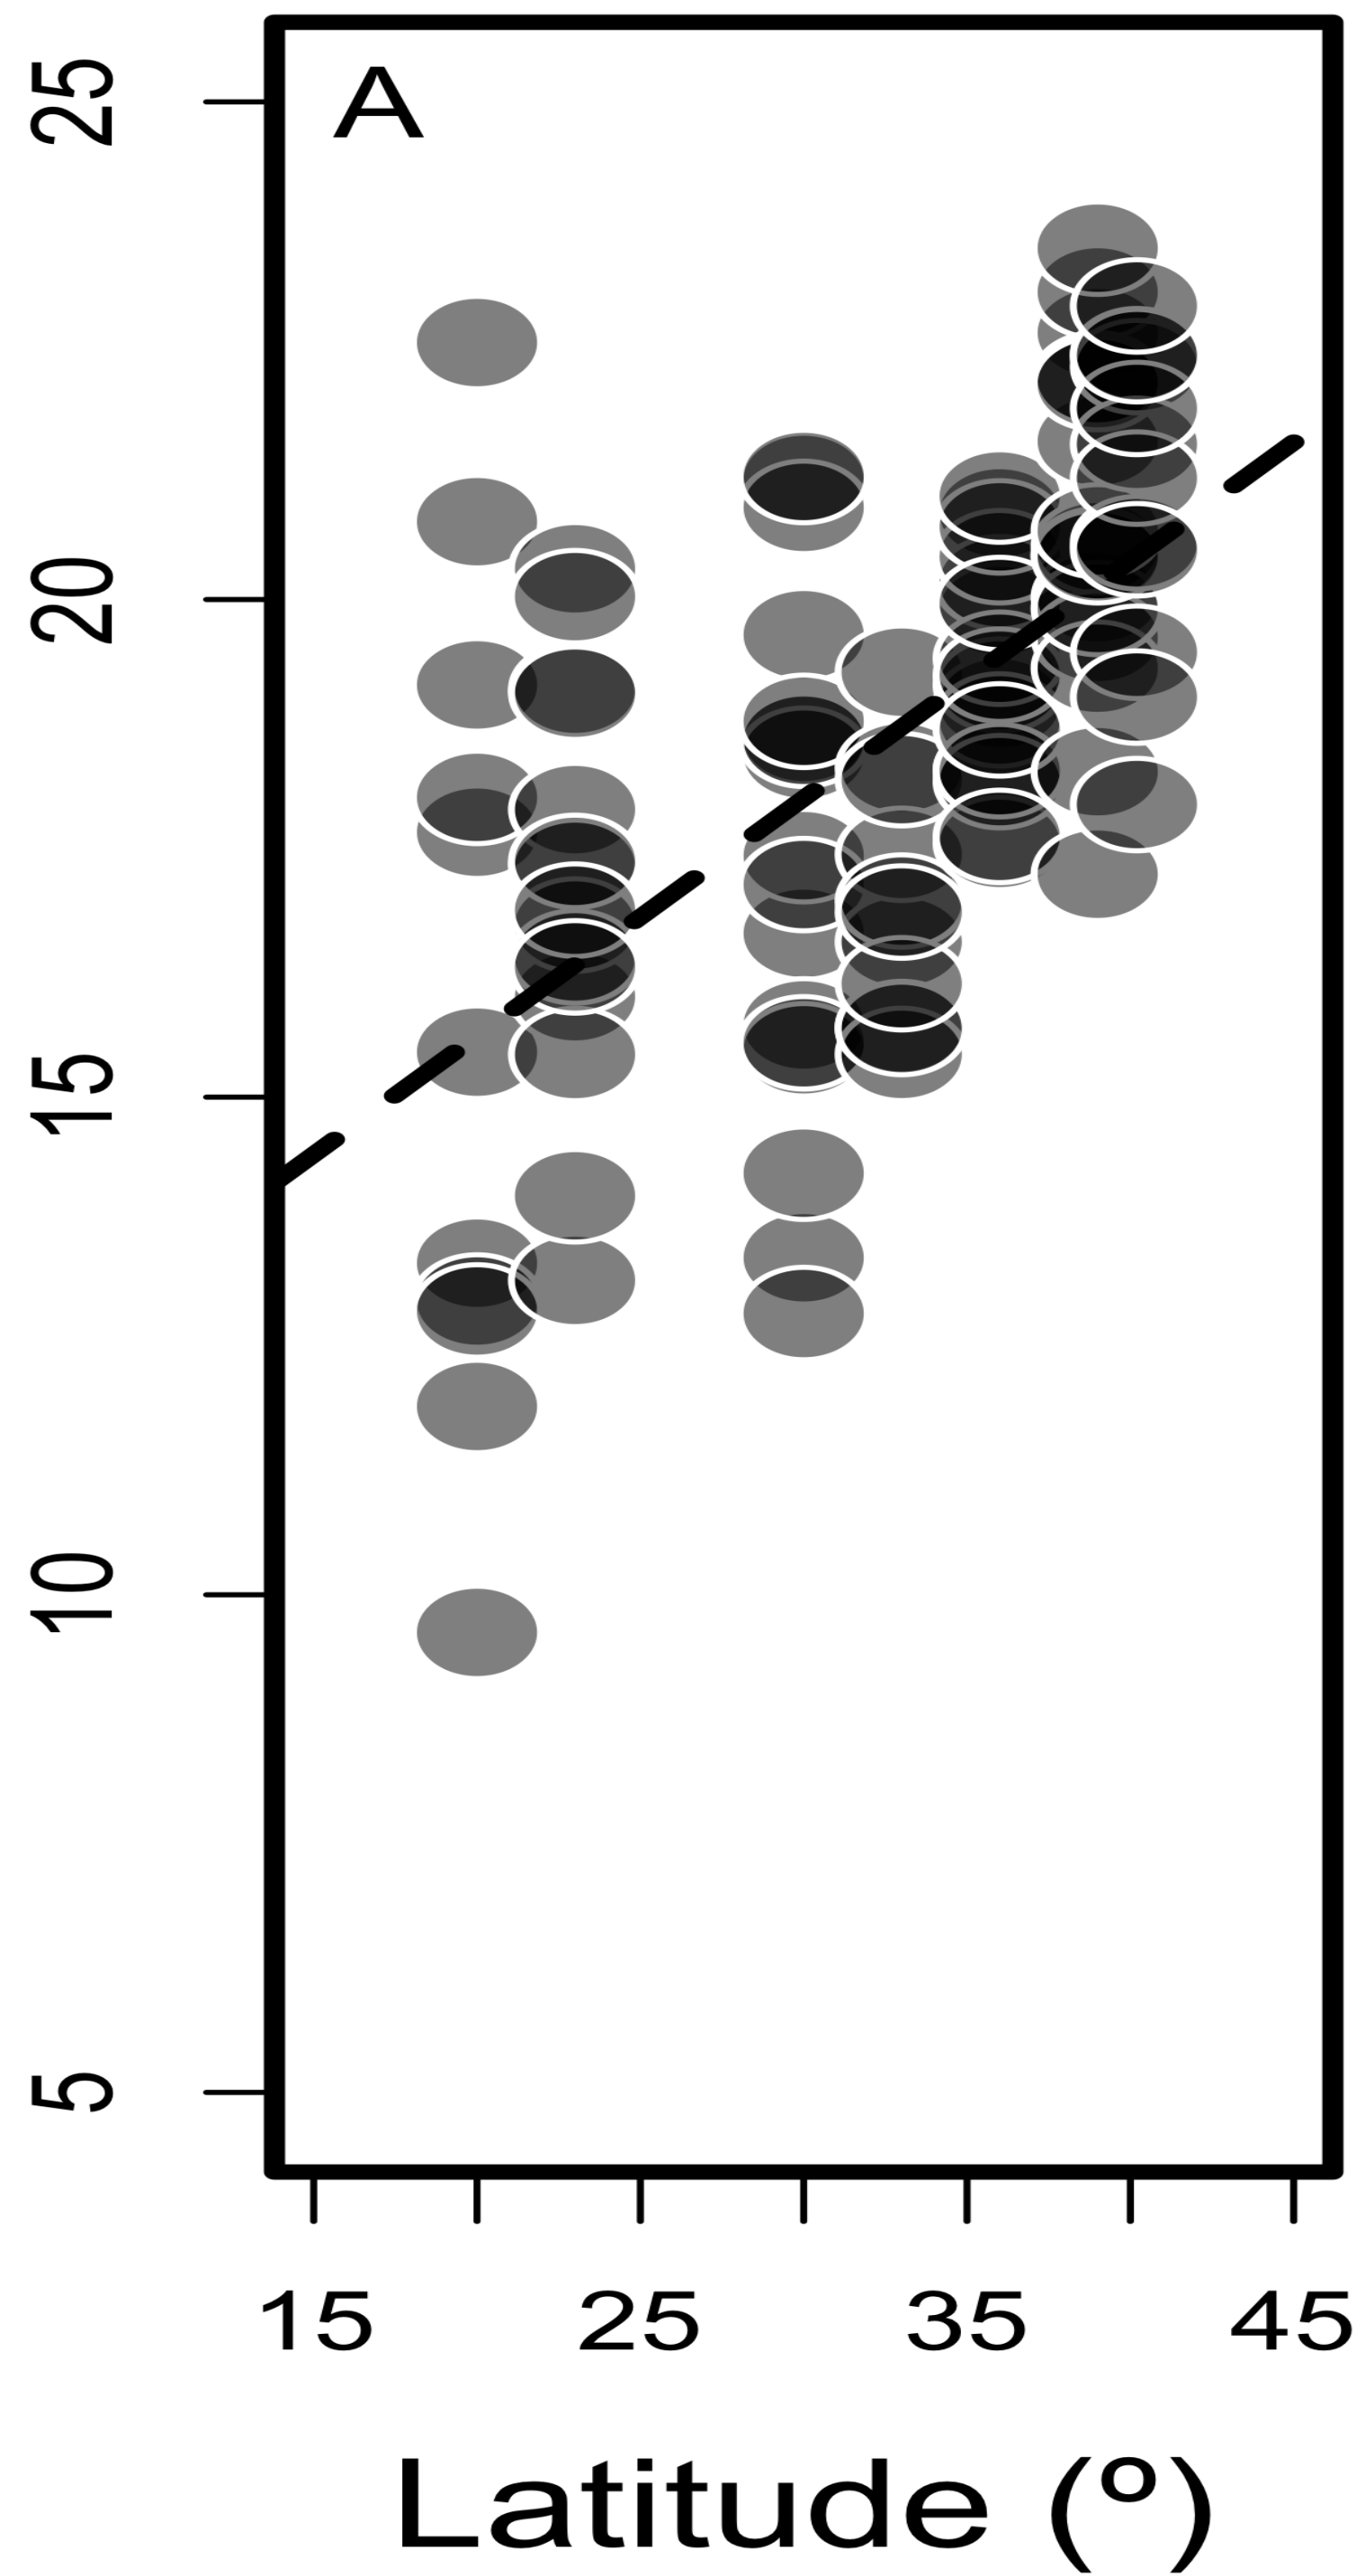

TSM (°C)

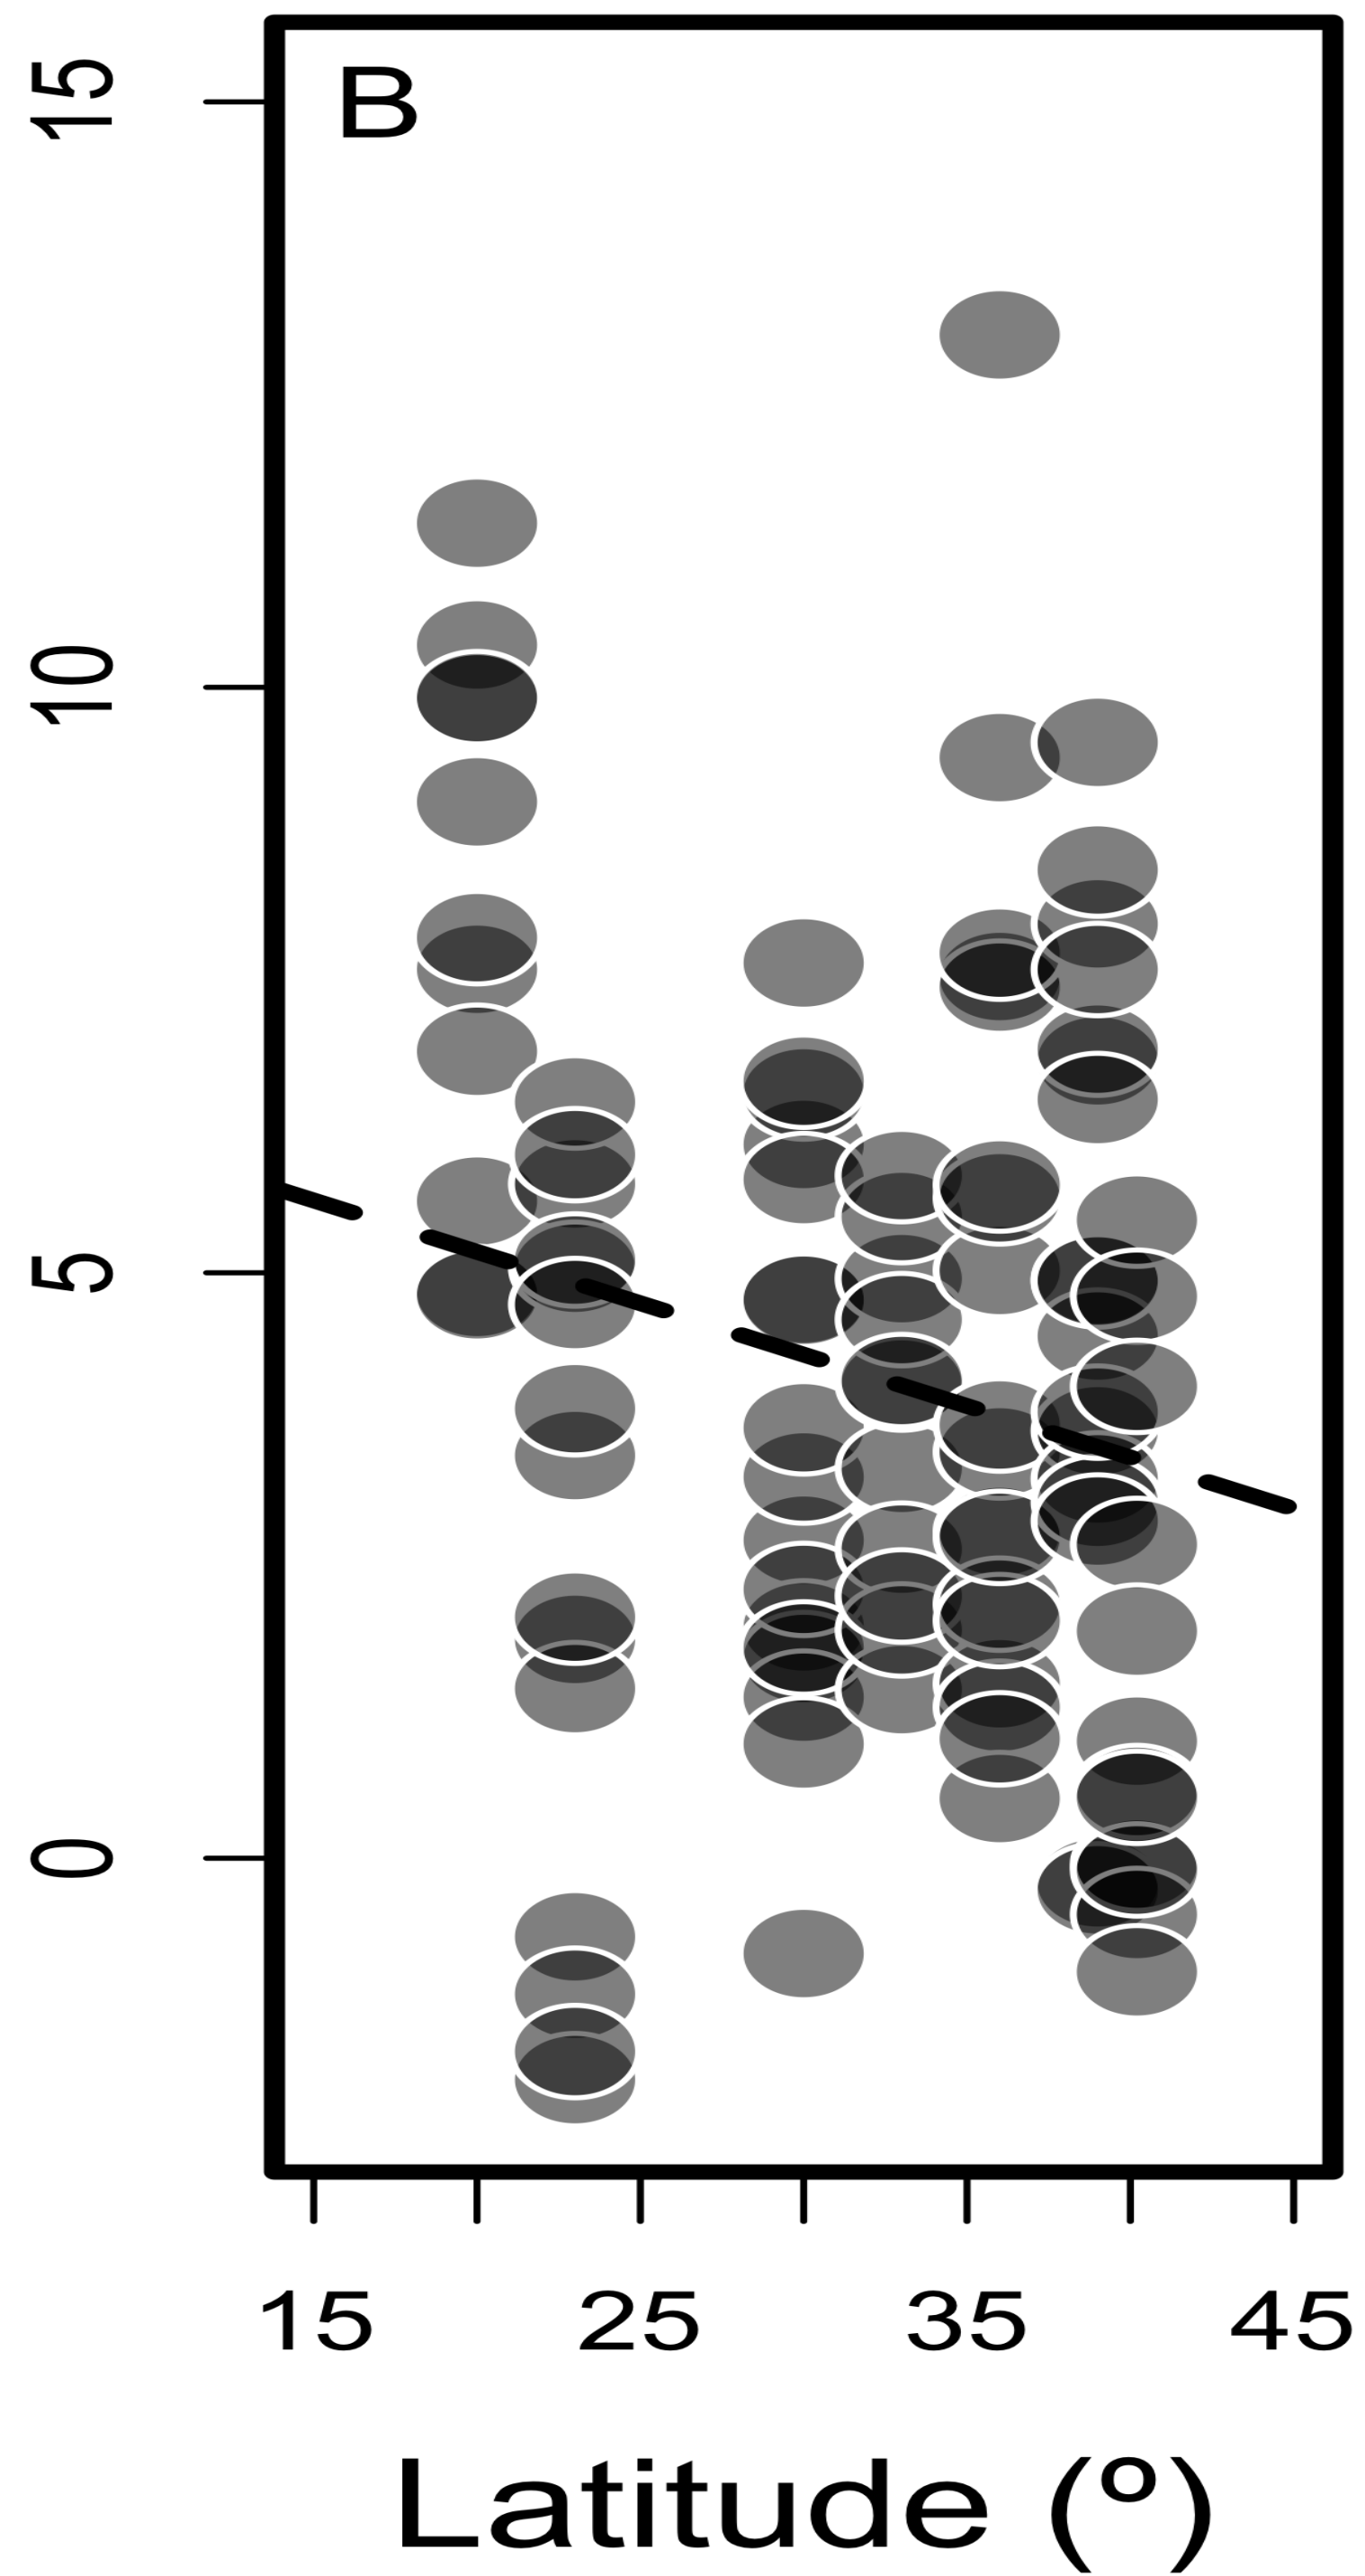

Source: https://cob.silverchair.com/jeb/article-pdf/doi/10.1242/jeb.108217/2038234/jeb_108217.pdf
